# Supplementary material for: Asymmetric aza-Henry reaction of chiral fluoroalkyl α,β-unsaturated N-tert-butanesulfinyl ketoimines: an efficient approach to enantiopure fluoroalkylated α,β-diamines and α,β-diamino acids
Source: Royal Society of Chemistry journal article supplement (doi:10.1039/c1ob05132f), 2011-01-01

**Asymmetric aza-Henry reaction of chiral fluoroalkyl  
 $\alpha,\beta$ -unsaturated *N-tert*-butanesulfinyl ketoimines: an efficient  
approach to enantiopure fluoroalkylated  $\alpha,\beta$ -diamines and  
 $\alpha,\beta$ -diamino acids**

Fan Zhang, Zhen-Jiang Liu, Jin-Tao Liu\*

Key Laboratory of Organofluorine Chemistry, Shanghai Institute of Organic Chemistry, Chinese  
Academy of Sciences, 345 Lingling Road, Shanghai 200032, China

**General information**

Solvents were freshly distilled using general method to remove water. Column chromatography was performed on silica gel employing petroleum ether-ethyl acetate mixture as eluant. Substrates **1a-1h** were prepared according to literature procedures.<sup>1</sup>

Melting points were taken on a Melt-Temp apparatus and uncorrected. IR spectra were obtained with a Nicolet AV-360 spectrophotometer. <sup>1</sup>H NMR spectra were recorded in CDCl<sub>3</sub> on a Bruker AM-300 spectrometer (300 MHz) with TMS as internal standard. <sup>19</sup>F NMR spectra were taken on a Bruker AM-300 (282 MHz) spectrometer using CFC<sub>3</sub> as external standard. <sup>13</sup>C NMR spectra were recorded on Bruker DPX-400 (100 MHz) spectrometer. Mass spectra were obtained on a Shimadzu LCMS-2010EV spectrometer. High-resolution mass data was obtained on Bruker Daltonics, Inc. APEXIII 7.0 TESLA FTMS spectrometer. Elemental analyses were performed on a Foss-Heraeus Vario EL III instrument. Specific rotations were determined on a Perkin-Elmer 241 spectrometer at room temperature.

**Synthesis of substrate 1g**

Procedure is the same with Reference 1.

**(*R,E*)-*N*-((*E*)-1,1-difluoro-4-phenylbut-3-en-2-ylidene)-*tert*-butanesulfinamide  
(1g)**

---

\* Corresponding author. Tel: 86-21-54925188; Fax: 86-21-64166128; E-mail: jtliu@mail.sioc.ac.cn

Yellowish viscous liquid; IR (film):  $\nu$  1615, 1580, 1450, 1365, 1108, 1081, 1048  $\text{cm}^{-1}$ ;  $^1\text{H}$  NMR (300 MHz,  $\text{CDCl}_3$ ):  $\delta$  7.97 (d,  $J = 16.2$  Hz, 1 H), 7.62-7.50 (m, 3H), 7.43-7.33 (m, 3H), 6.20 (t,  $J = 54.6$  Hz, 1 H), 1.33 (s, 9 H);  $^{19}\text{F}$  NMR (282 MHz,  $\text{CDCl}_3$ ):  $\delta$  -114.92 - -114.61 (m, 2 F);  $^{13}\text{C}$  NMR (75 MHz,  $\text{CDCl}_3$ ):  $\delta$  165.4 (t,  $J = 26.5$  Hz), 144.0, 135.3, 130.9, 129.2, 128.6, 116.3, 115.1 (t, 250.2 Hz), 60.1, 23.2; MS (ESI,  $m/z$ , %): 286  $[\text{M}+\text{H}]^+$ ; HRMS calcd. for  $\text{C}_{14}\text{H}_{17}\text{F}_2\text{NOSK}([\text{M}+\text{K}]^+)$ : 324.0631. Found: 324.0627.

### Typical procedure for aza-Henry reaction of **1**

Potassium carbonate anhydrous (2.8 mg, 0.02 mmol) was added to a solution of **1a** (30.0 mg, 0.1 mmol) in nitromethane (0.5 mL) at room temperature. The reaction mixture was stirred for 3 hours. After removal of the volatile solvent under vacuum, **2a** was obtained via silica gel chromatography (Petroleum Ether/EtOAc = 5/1) in the yield of 31.0 mg (85%).

### (*E*)-2-methyl-*N*-(1,1,1-trifluoro-2-(nitromethyl)-4-phenylbut-3-en-2-yl)propane-2-sulfonamide (**2a**)

Colorless crystal, yield 85%; mp: 72-74  $^\circ\text{C}$ ; IR (film):  $\nu$  3306, 3285, 2962, 1560, 1471, 1368, 1397, 1185, 1124, 1081, 1054  $\text{cm}^{-1}$ ;  $^1\text{H}$  NMR (300 MHz,  $\text{CDCl}_3$ ):  $\delta$  7.48-7.36 (m, 5 H), 6.91 (d,  $J = 16.2$  Hz, 1 H), 6.30 (d,  $J = 16.2$  Hz, 1 H), 5.45 (s, 1H), 5.08-4.99 (m, 2 H), 1.32 (s, 9 H);  $^{19}\text{F}$  NMR (282 MHz,  $\text{CDCl}_3$ ):  $\delta$  -76.4 (s, 3 F); MS (ESI,  $m/z$ , %): 365  $[\text{M}+\text{H}]^+$ ; Anal. Calcd. For  $\text{C}_{15}\text{H}_{19}\text{F}_3\text{N}_2\text{O}_3\text{S}$ : C, 49.44; H, 5.26; N, 7.69. Found: C, 49.24; H, 5.37; N, 7.56. The chiral HPLC analytical data: chiralpak IC column, detected at 214 nm, eluent: *n*-hexane/*iso*-propanol = 60/40, 0.7 mL/min, retention times:  $t_r$  (minor) = 5.85 min,  $t_r$  (major) = 6.19 min; ee% = 96.7%; Crystal data:  $\text{C}_{15}\text{H}_{19}\text{F}_3\text{N}_2\text{O}_3\text{S}$ ;  $M = 364.38$ ; Triclinic, P-1;  $a = 9.1431(10)$  Å,  $b = 9.1984(11)$  Å,  $c = 21.398(3)$  Å;  $\alpha = 98.890(2)$ ,  $\beta = 92.687(2)$ ,  $\gamma = 95.661(2)$ ,  $V = 1765.8(4)$  Å<sup>3</sup>;  $Z = 4$ ; 9748 reflections;  $R_{\text{int}} = 0.0668$ ;  $R_1 = 0.0562$  and  $wR_2 = 0.1244$ . Crystallographic data for the structures of **2a** have been deposited with the Cambridge Crystallographic Data Centre (CCDC 756867). Copies of the data can be obtained, free of charge, on

application to the Director, CCDC, 12 Union Road, Cambridge CB2 1EZ, United Kingdom (Fax: 44-1223-336033 or email: [deposit@ccdc.cam.ac.uk](mailto:deposit@ccdc.cam.ac.uk)).

**(E)-2-methyl-N-(1,1,1-trifluoro-4-(4-methoxyphenyl)-2-(nitromethyl)but-3-en-2-yl)propane-2-sulfinamide (2b)**

Colourless oil, yield 95%; IR (film):  $\nu$  3303, 2963, 1651, 1608, 1562, 1515, 1468, 1375, 1253, 1179, 1074  $\text{cm}^{-1}$ ;  $^1\text{H}$  NMR (300 MHz,  $\text{CDCl}_3$ ):  $\delta$  7.31 (d,  $J = 8.7$  Hz, 2 H), 6.82-6.72 (m, 3 H), 6.05 (d,  $J = 16.8$  Hz, 1 H), 5.36 (s, 1H), 4.98-4.88 (m, 2 H), 3.72 (s, 3 H), 1.16 (s, 9 H);  $^{19}\text{F}$  NMR (282 MHz,  $\text{CDCl}_3$ ):  $\delta$  -76.6 (s, 3 F);  $^{13}\text{C}$  NMR (75 MHz,  $\text{CDCl}_3$ ):  $\delta$  160.9, 137.3, 128.9, 127.4, 124.3 (q,  $J = 213.6$  Hz), 115.9, 114.5, 66.1, 63.4 (q,  $J = 21.3$  Hz), 57.2, 55.5, 22.8; MS (ESI,  $m/z$ , %): 395  $[\text{M}+\text{H}]^+$ , 417  $[\text{M}+\text{Na}]^+$ ; HRMS calcd. for  $\text{C}_{16}\text{H}_{21}\text{F}_3\text{N}_2\text{O}_4$   $\text{SNa}$  ( $[\text{M}+\text{Na}]^+$ ): 417.1066. Found: 417.1062.

**(E)-N-(4-(4-chlorophenyl)-1,1,1-trifluoro-2-(nitromethyl)but-3-en-2-yl)-2-methylpropane-2-sulfinamide (2c)**

Colourless oil, yield 91%; IR (film):  $\nu$  3302, 2965, 1734, 1652, 1563, 1493, 1374, 1138, 1014  $\text{cm}^{-1}$ ;  $^1\text{H}$  NMR (300 MHz,  $\text{CDCl}_3$ ):  $\delta$  7.41-7.32 (m, 4 H), 6.89 (d,  $J = 16.8$  Hz, 1 H), 6.27 (d,  $J = 16.8$  Hz, 1 H), 5.43 (s, 1H), 5.06-4.96 (m, 2 H), 1.31 (s, 9 H);  $^{19}\text{F}$  NMR (282 MHz,  $\text{CDCl}_3$ ):  $\delta$  -76.2 (s, 3 F);  $^{13}\text{C}$  NMR (75 MHz,  $\text{CDCl}_3$ ):  $\delta$  136.9, 135.7, 133.2, 129.4, 128.8, 124.2 (q,  $J = 212.9$  Hz), 119.2, 66.1, 63.7 (q,  $J = 21.4$  Hz), 57.5, 22.8; MS (ESI,  $m/z$ , %): 399  $[\text{M}+\text{H}]^+$ , 421  $[\text{M}+\text{Na}]^+$ ; HRMS calcd. for  $\text{C}_{15}\text{H}_{19}\text{ClF}_3\text{N}_2\text{O}_3\text{S}$  ( $[\text{M}+\text{H}]^+$ ): 399.0752. Found: 399.0747.

**(E)-2-methyl-N-(1,1,1-trifluoro-4-(naphthalen-1-yl)-2-(nitromethyl)but-3-en-2-yl)propane-2-sulfinamide (2d)**

Colourless oil, yield 91%; IR (film):  $\nu$  3302, 3048, 2966, 1735, 1561, 1474, 1373, 1230, 1074;  $^1\text{H}$  NMR (300 MHz,  $\text{CDCl}_3$ ):  $\delta$  8.10-8.06 (d,  $J = 8.1$  Hz, 1 H), 7.88-7.85 (m, 2 H), 7.75 (d,  $J = 16.8$  Hz, 1 H), 7.63-7.44 (m, 4 H), 6.32 (d,  $J = 16.8$  Hz, 1 H), 5.46 (s, 1H), 5.14-5.05 (m, 2 H), 1.34 (s, 9 H);  $^{19}\text{F}$  NMR (282 MHz,  $\text{CDCl}_3$ ):  $\delta$  -76.3

(s, 3 F);  $^{13}\text{C}$  NMR (75 MHz,  $\text{CDCl}_3$ ):  $\delta$  136.4, 133.8, 133.0, 131.4, 130.1, 128.9, 127.3, 126.6, 125.8, 125.2, 124.3 (q,  $J = 213.8$  Hz), 123.9, 121.8, 66.2, 64.1 (q,  $J = 21.0$  Hz), 57.6, 22.9; MS (ESI,  $m/z$ , %): 415  $[\text{M}+\text{H}]^+$ , 437  $[\text{M}+\text{Na}]^+$ ; HRMS calcd. for  $\text{C}_{19}\text{H}_{21}\text{F}_3\text{N}_2\text{NaO}_3\text{S}$  ( $[\text{M}+\text{Na}]^+$ ): 437.1117. Found: 437.1113.

**(*E*)-2-methyl-*N*-(1,1,1-trifluoro-2-(nitromethyl)dodec-3-en-2-yl)propane-2-sulfonamide (2e)**

Colourless oil, yield 68%; IR (film):  $\nu$  3303, 2960, 2930, 2858, 1564, 1469, 1374, 1185, 1133, 1075  $\text{cm}^{-1}$ ;  $^1\text{H}$  NMR (300 MHz,  $\text{CDCl}_3$ ):  $\delta$  6.07-5.98 (m, 1 H), 5.63 (d,  $J = 16.8$  Hz, 1 H), 5.32 (s, 1H), 4.96-4.85 (m, 2 H), 2.24-2.16 (m, 2H), 1.45-1.42 (m, 2H), 1.30-1.18 (m, 19H), 0.88 (t,  $J = 5.6$  Hz, 3H);  $^{19}\text{F}$  NMR (282 MHz,  $\text{CDCl}_3$ ):  $\delta$  -76.8 (s, 3 F);  $^{13}\text{C}$  NMR (75 MHz,  $\text{CDCl}_3$ ):  $\delta$  140.8, 124.2 (q,  $J = 213.2$  Hz), 119.9, 66.1, 63.2 (q,  $J = 21.3$  Hz), 57.1, 33.2, 32.1, 29.5, 29.2, 28.5, 22.9, 22.8, 22.5, 14.3; MS (ESI,  $m/z$ , %): 401  $[\text{M}+\text{H}]^+$ , 423  $[\text{M}+\text{Na}]^+$ ; HRMS calcd. for  $\text{C}_{17}\text{H}_{31}\text{F}_3\text{N}_2\text{NaO}_3\text{S}$  ( $[\text{M}+\text{Na}]^+$ ): 423.1900. Found: 423.1902.

**(*E*)-*N*-(1-chloro-1,1-difluoro-2-(nitromethyl)-4-phenylbut-3-en-2-yl)-2-methylpropane-2-sulfonamide (2f)**

Colourless crystal, yield 80%; Mp: 95-96 °C; IR (film):  $\nu$  3303, 2964, 1649, 1561, 1372, 1263, 1176, 1075  $\text{cm}^{-1}$ ;  $^1\text{H}$  NMR (300 MHz,  $\text{CDCl}_3$ ):  $\delta$  7.47-7.35 (m, 5 H), 6.87 (d,  $J = 16.8$  Hz, 1 H), 6.35 (d,  $J = 16.8$  Hz, 1 H), 5.48 (s, 1H), 5.17, 5.10 (AB,  $J_{\text{AB}} = 12.0$  Hz, 2 H), 1.34 (s, 9 H);  $^{19}\text{F}$  NMR (282 MHz,  $\text{CDCl}_3$ ):  $\delta$  -62.2 (s, 2 F); MS (ESI,  $m/z$ , %): 381  $[\text{M}+\text{H}]^+$ , 403  $[\text{M}+\text{Na}]^+$ ; Anal. Calcd. For  $\text{C}_{15}\text{H}_{19}\text{ClF}_2\text{N}_2\text{O}_3\text{S}$ : C, 47.31; H, 5.03; N, 7.36. Found: C, 47.35; H, 5.17; N, 7.27.

**(*E*)-*N*-(1,1-difluoro-2-(nitromethyl)-4-phenylbut-3-en-2-yl)-2-methylpropane-2-sulfonamide (2g)**

Colourless crystal, yield 54%; Mp: 118-119 °C; IR (film):  $\nu$  3292, 2975, 1654, 1559, 1469, 1381, 1317, 1261, 1171, 1140, 1060  $\text{cm}^{-1}$ ;  $^1\text{H}$  NMR (300 MHz,  $\text{CDCl}_3$ ):  $\delta$  7.45-7.32 (m, 5 H), 6.85 (d,  $J = 16.8$  Hz, 1 H), 6.20 (d,  $J = 16.8$  Hz, 1 H), 6.09 (t,  $J =$

55.2 Hz, 1 H), 5.02-5.00 (m, 2H), 4.79 (s, 1H), 1.30 (s, 9 H);  $^{19}\text{F}$  NMR (282 MHz,  $\text{CDCl}_3$ ):  $\delta$  -127.9, -130.1 (ABd,  $J_{\text{AB}} = 280.4$  Hz,  $J_{\text{d}} = 54.2$  Hz, 2 F); MS (ESI,  $m/z$ , %): 347  $[\text{M}+\text{H}]^+$ , 369  $[\text{M}+\text{Na}]^+$ ; Anal. Calcd. For  $\text{C}_{15}\text{H}_{20}\text{F}_2\text{N}_2\text{O}_3\text{S}$ : C, 52.01; H, 5.82; N, 8.09. Found: C, 52.31; H, 5.87; N, 7.90.

**(R)-N-(1,1,1,2,2,3,3-heptafluoro-7-nitro-6-phenylheptan-4-ylidene)-2-methylpropane-2-sulfinamide (2h-1)**

Colorless sticky thick oil, yield 35%; IR (film):  $\nu$  2968, 1639, 1558, 1379, 1346, 1232, 1121, 1087  $\text{cm}^{-1}$ ;  $^1\text{H}$  NMR (300 MHz,  $\text{CDCl}_3$ ):  $\delta$  7.36-7.27 (m, 5 H), 4.75-4.68 (m, 2 H), 4.06-4.01 (m, 1 H), 3.74-3.66 (m, 1 H), 3.21-3.14 (m, 1 H), 1.30 (s, 9 H);  $^{19}\text{F}$  NMR (282 MHz,  $\text{CDCl}_3$ ):  $\delta$  -79.9 (t,  $J = 16.8$  Hz, 3 F), -112.3, -113.5 (AB,  $J_{\text{AB}} = 282.4$  Hz, 2 F), -124.6 (s, 2 F);  $^{13}\text{C}$  NMR (75 MHz,  $\text{CDCl}_3$ ):  $\delta$  166.3 (t,  $J = 20.1$  Hz), 137.4, 129.5, 128.8, 128.0, 79.3, 60.6, 42.3, 34.6, 23.0; MS (ESI,  $m/z$ , %): 465  $[\text{M}+\text{H}]^+$ , 487  $[\text{M}+\text{Na}]^+$ ; HRMS calcd. for  $\text{C}_{17}\text{H}_{19}\text{F}_7\text{N}_2\text{NaO}_3\text{S}$  ( $[\text{M}+\text{Na}]^+$ ): 487.0897; Found: 487.0907.

**(R)-2-methyl-N-((Z)-1,1,1-trifluoro-5-nitro-4-phenylpent-2-en-2-yl)propane-2-sulfinamide (2h-2)**

Colorless sticky thick oil, yield 52%; IR (film):  $\nu$  3285, 2966, 1657, 1558, 1457, 1376, 1345, 1232, 1116, 1079  $\text{cm}^{-1}$ ;  $^1\text{H}$  NMR (300 MHz,  $\text{CDCl}_3$ ):  $\delta$  7.41-7.30 (m, 3 H), 7.30-7.23 (m, 2 H), 6.45 (d,  $J = 8.1$  Hz, 1 H), 4.87-4.81 (m, 1H), 4.81-4.63 (m, 3 H), 1.20 (s, 9 H);  $^{19}\text{F}$  NMR (282 MHz,  $\text{CDCl}_3$ ):  $\delta$  -80.5 (m, 3 F), -113.0, -115.4 (AB,  $J_{\text{AB}} = 282.4$  Hz, 2 F), -125.4, -126.5 (AB,  $J_{\text{AB}} = 289.2$  Hz, 2 F);  $^{13}\text{C}$  NMR (75 MHz,  $\text{CDCl}_3$ ):  $\delta$  136.8, 131.1 (t,  $J = 5.8$  Hz), 130.4 (t,  $J = 24.1$  Hz), 130.0, 128.9, 128.2, 79.7, 57.7, 47.8, 22.4; MS (ESI,  $m/z$ , %): 465  $[\text{M}+\text{H}]^+$ , 487  $[\text{M}+\text{Na}]^+$ ; HRMS calcd. for  $\text{C}_{17}\text{H}_{19}\text{F}_7\text{N}_2\text{NaO}_3\text{S}$  ( $[\text{M}+\text{Na}]^+$ ): 487.0897. Found: 487.0905.

**Synthesis of 4a**

An ethereal solution of hydrogen chloride (saturated, 25 mL) was added to a solution of **2a** (3.0 g, 8.38 mmol) in 20 mL methanol at 0°C. After stirred at room temperature

for 0.5 hour, the mixture was concentrated in vacuo to give the crude hydrolysis product **3a**. Without further purification, **3a** was dissolved into 80 mL methanol and cooled to 0°C, then hydrochloric acid (1.0N, 80 mL) and zinc powder (5.5 g, 83.8 mmol) were added successively. After stirred at room temperature overnight, the reaction mixture was neutralized by sodium hydroxide aqueous (1.0 N) till PH = 7. Removing CH<sub>3</sub>OH by evaporation in vacuo afforded a lot of inorganic salts, which was dissolved by 200 mL water. The mixture was extracted with dichloromethane (200 mL x 3) and washed with brine (200 mL x 2). The combined organic layer was dried over anhydrous sodium sulfate. Filtration and evaporation of the solvents afforded the crude product, which was purified by flash column chromatography on silica gel (Petroleum Ether/Ethyl Acetate = 3/1).

#### **(*S, E*)-4-phenyl-2-(trifluoromethyl)but-3-ene-1,2-diamine 4a**

Vicious colourless oil, Over all yield of two steps: 69%;  $[\alpha]_D^{20}$  1.57 (c = 1.58, CHCl<sub>3</sub>); IR (film):  $\nu$  3371, 3028, 2944, 2889, 1603, 1492, 1449, 1289, 1255, 1169, 1030 cm<sup>-1</sup>; <sup>1</sup>H NMR (300 MHz, CDCl<sub>3</sub>):  $\delta$  7.46-7.39 (m, 2 H), 7.39-7.24 (m, 3 H), 6.86 (d, *J* = 16.2 Hz, 1 H), 6.18 (d, *J* = 16.2 Hz, 1 H), 2.94, 2.89 (AB, *J*<sub>AB</sub> = 13.8 Hz, 2H), 1.59 (s, 4 H); <sup>19</sup>F NMR (282 MHz, CDCl<sub>3</sub>):  $\delta$  -79.8 (s, 3 F); <sup>13</sup>C NMR (75 MHz, CD<sub>3</sub>OD):  $\delta$  138.3, 136.1, 130.6, 130.1, 128.7, 126.5, 63.7 (q, *J* = 24.4 Hz), 46.9; MS (ESI, *m/z*, %): 230 [M]<sup>+</sup>; HRMS calcd. for C<sub>11</sub>H<sub>14</sub>F<sub>3</sub>N<sub>2</sub> ([M+H]<sup>+</sup>): 231.1104. Found: 231.1112. Anal. Calcd. For C<sub>11</sub>H<sub>13</sub>F<sub>3</sub>N<sub>2</sub>: C, 57.39; H, 5.69; N, 12.17. Found: C, 57.24; H, 5.77; N, 11.86.

#### **Synthesis of 5a**

Di-*tert*-butyl dicarbonate (5.78 g, 26.5 mmol, dissolved in 50 mL dichloromethane) was added dropwisely to a solution of **4a** (1.23 g, 5.3 mmol) and *N*, *N*-4-dimethylaminopyridine (DMAP) (647 mg, 5.3 mmol) in 50 mL dichloromethane at 0 °C. After stirring for 1 hour at room temperature, 100 mL water was added. The mixture was extracted with dichloromethane (100 mL x 3) and washed with brine (200 mL x 2). The combined organic layer was dried over anhydrous sodium sulfate.

Filtration and evaporation of the solvents afforded the crude product, which was purified by flash column chromatography on silica gel (Petroleum Ether/Ethyl Acetate = 5/1).

**(*S,E*)-di-*tert*-butyl 4-phenyl-2-(trifluoromethyl)but-3-ene-1,2-diylldicarbamate (5a)**

Vicious colourless oil, yield 95%;  $[\alpha]_D^{20}$  -30.92 ( $c = 1.19$ ,  $\text{CHCl}_3$ ); IR (film):  $\nu$  3063, 2981, 2935, 1817, 1721, 1652, 1477, 1451, 1371, 1287, 1148, 1061, 1011  $\text{cm}^{-1}$ ;  $^1\text{H}$  NMR (300 MHz,  $\text{CDCl}_3$ ):  $\delta$  7.45-7.31 (m, 5 H), 6.76 (d,  $J = 16.5$  Hz, 1 H), 6.51 (d,  $J = 16.5$  Hz, 1 H), 4.13 (d,  $J = 11.7$  Hz, 1 H), 3.83 (d,  $J = 11.7$  Hz, 1 H), 1.55 (s, 9 H), 1.46 (s, 9 H);  $^{19}\text{F}$  NMR (282 MHz,  $\text{CDCl}_3$ ):  $\delta$  -75.2 (m, 3 F); MS ( $m/z$ , %): 300 ( $[\text{M}-\text{C}_4\text{H}_9-\text{C}_4\text{H}_9\text{O}]^+$ , 89), 57 (100); HRMS calcd. for  $\text{C}_{13}\text{H}_{11}\text{F}_3\text{N}_2\text{O}_3$  ( $[\text{M}-\text{C}_4\text{H}_9-\text{C}_4\text{H}_9\text{O}]^+$ ): 300.0722. Found: 300.0718; Anal. Calcd. For  $\text{C}_{21}\text{H}_{29}\text{F}_3\text{N}_2\text{O}_4$ : C, 58.59; H, 6.79; N, 6.51. Found: C, 58.80; H, 6.60; N, 6.24. The chiral HPLC analytical data: chiralpak IB column, detected at 214 nm, eluent: *n*-hexane/*iso*-propanol = 70/30, 0.7 mL/min, retention times:  $t_r$  (major) = 5.37 min,  $t_r$  (minor) = 6.17 min; ee % = 99.3%.

**Synthesis of 6a**

Ozone was bubbled to a solution of **5a** (2.28 g, 5.3 mmol) in 70 mL dichloromethane at  $-78$  °C till the mixture turned to be dark blue. After stirring at this temperature for 0.5 hour, triphenyl phosphine (1.39 g, 5.3 mmol) was added. The mixture was warmed to room temperature and stirred for a while till it was colourless. Flash chromatography was performed to give pure **6a** (Petroleum Ether/Ethyl Acetate = 1/2).

**(*R*)-di-*tert*-butyl 3,3,3-trifluoro-2-formylpropane-1,2-diylldicarbamate (6a)**

Vicious colourless oil, yield 95%; IR (film):  $\nu$  3416, 2983, 1785, 1482, 1397, 1344, 1292, 1163, 1041  $\text{cm}^{-1}$ ;  $^1\text{H}$  NMR (300 MHz,  $\text{CDCl}_3$ ):  $\delta$  9.70 (s, 1 H), 3.96, 3.86 (AB,

$J_{AB} = 12.0$  Hz, 2 H), 1.56 (s, 9 H), 1.53 (s, 9 H);  $^{19}\text{F}$  NMR (282 MHz,  $\text{CDCl}_3$ ):  $\delta$  -76.1 (s, 3 F); MS ( $m/z$ , %): 242 ( $[\text{M}-2\text{C}_4\text{H}_9]^+$ , 29), 57 (100).

### Synthesis of 7a

Sodium chlorite (216 mg, 2.4 mmol) and 2-methyl-2-butene (0.8 mL) were added to a solution of **6a** (238 mg, 0.67 mmol) and sodium phosphate monobasic dihydrate (328 mg, 2.1 mmol) in 5 mL water and 4.0 g *tert*-butyl alcohol at 0 °C. After stirred at this temperature for 0.5 hour, the mixture was warmed to room temperature and stirred overnight. The reaction mixture was neutralized by sodium hydroxide aqueous (2.0 N) till PH = 9. *tert*-Butyl alcohol was removed by evaporation in vacuo. The mixture was extracted with dichloromethane (20 mL x 3). The combined water layer was neutralized with hydrochloride aqueous (1.4 N) till PH = 3. The mixture was extracted with dichloromethane (20 mL x 3). Evaporation of the solvents afforded the crude product.

### **(R)-2-(tert-butoxycarbonylamino)-2-((tert-butoxycarbonylamino)methyl)-3,3,3-trifluoropropanoic acid (7a)**

White solid, yield 95%; Mp: 116-118 °C;  $[\alpha]_{\text{D}}^{20}$  -4.52 ( $c = 0.92$ ,  $\text{CH}_3\text{OH}$ ); IR (film):  $\nu$  3459, 2986, 1804, 1771, 1742, 1478, 1374, 1277, 1221, 1144, 1075  $\text{cm}^{-1}$ ;  $^1\text{H}$  NMR (300 MHz,  $\text{CDCl}_3$ ):  $\delta$  8.04-7.67 (br, 2 H), 4.00, 3.91 (AB,  $J_{AB} = 12.0$  Hz, 2 H), 1.47 (s, 9 H), 1.42 (s, 9 H);  $^{19}\text{F}$  NMR (282 MHz,  $\text{CDCl}_3$ ):  $\delta$  -74.7 (s, 3 F); MS ( $m/z$ , %): 242 ( $[\text{M}-\text{C}_4\text{H}_9-\text{C}_4\text{H}_9\text{O}]^+$ , 1.41), 57 (100); HRMS calcd. for  $\text{C}_6\text{H}_5\text{F}_3\text{N}_2\text{O}_5$  ( $[\text{M}-\text{C}_4\text{H}_9-\text{C}_4\text{H}_9\text{O}]^+$ ): 242.0151. Found: 242.0153.

### Synthesis of 8a

Thionyl chloride (2.8 mg, 0.02 mmol) was added to a solution of **7a** (37 mg, 0.1 mmol) in methanol (0.5 mL) at room temperature. The reaction mixture was stirred for 3 hours. After removal of the volatile solvent under vacuum, **8a** was obtained in 95% yield.

### **(R)-methyl 2-amino-2-(aminomethyl)-3,3,3-trifluoropropanoate (8a)**



White solid, yield 95%; Mp: 155-157 °C;  $[\alpha]_D^{20}$  6.06 (c = 0.48, CH<sub>3</sub>OH); IR (film):  $\nu$  3245, 2923, 1720, 1497, 1459, 1374, 1306, 1193, 1085, 1059 cm<sup>-1</sup>; <sup>1</sup>H NMR (300 MHz, CD<sub>3</sub>OD):  $\delta$  3.92, 3.78 (AB,  $J_{AB}$  = 10.5 Hz, 2 H), 3.89 (s, 3H); <sup>19</sup>F NMR (282 MHz, CD<sub>3</sub>OD):  $\delta$  -78.1 (s, 3H); <sup>13</sup>C NMR (75 MHz, CD<sub>3</sub>OD):  $\delta$  169.4, 123.8 ( $J$  = 281.4 Hz), 67.9 (q,  $J$  = 30.8 Hz), 55.2, 46.3; MS (EI,  $m/z$ , %): 154 ([M-CH<sub>3</sub>-H<sub>2</sub>O]<sup>+</sup>, 8.09), 153 (100); HRMS calcd. for C<sub>4</sub>H<sub>5</sub>F<sub>3</sub>N<sub>2</sub>O ([M-CH<sub>3</sub>-H<sub>2</sub>O]<sup>+</sup>): 154.0354. Found: 154.0351.

## Reference

1. Liu, Z.-J. Ph. D. Dissertation, Shanghai institute of organic chemistry, Chinese academy of sciences, **2008**.

**(*R,E*)-*N*-((*E*)-1,1-difluoro-4-phenylbut-3-en-2-ylidene)-*tert*-butanesulfinamide**

**(1g)**

<sup>1</sup>H NMR Spectra

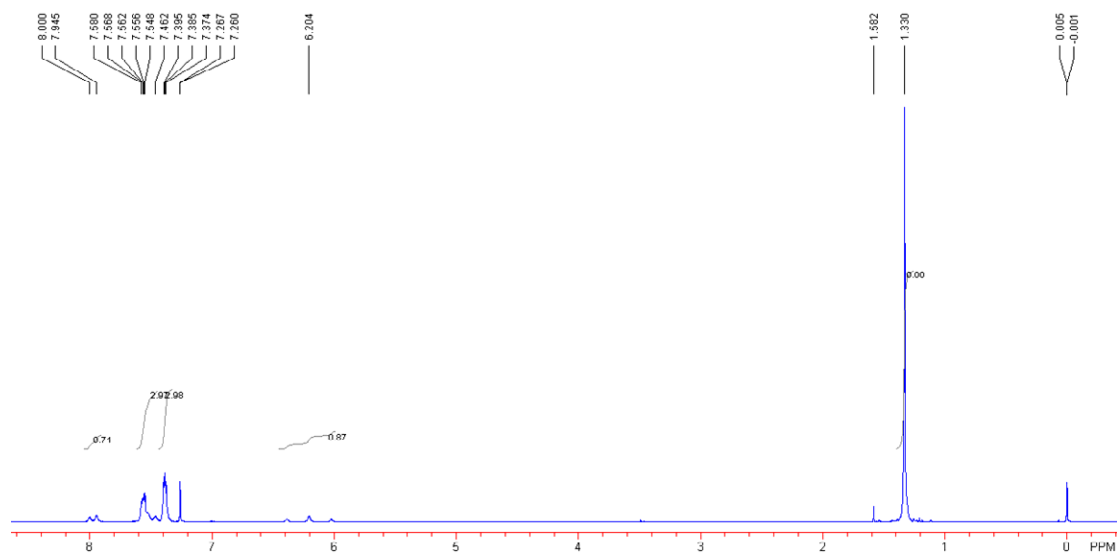

<sup>19</sup>F NMR Spectra

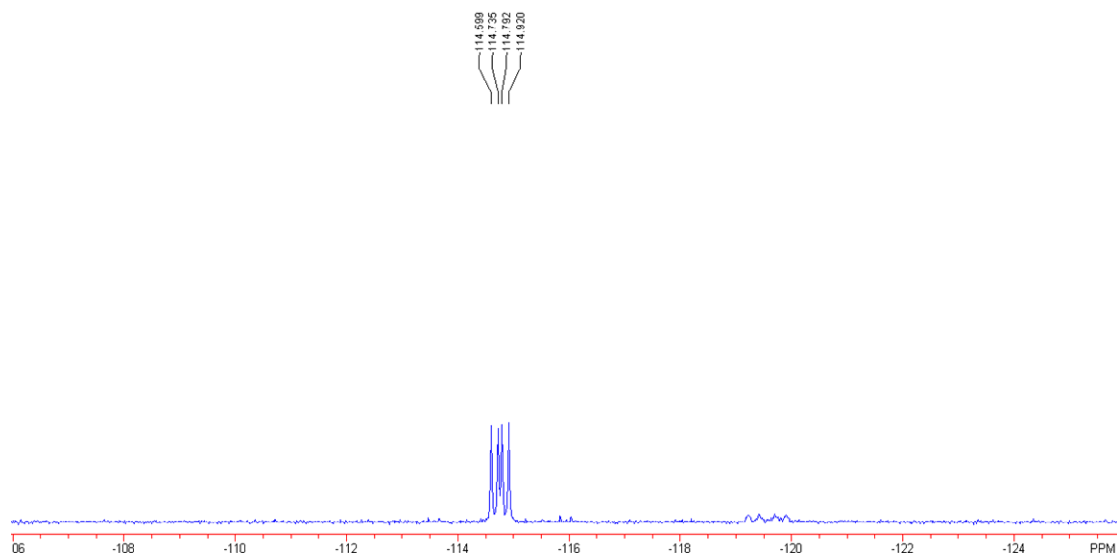

<sup>13</sup>C NMR Spectra

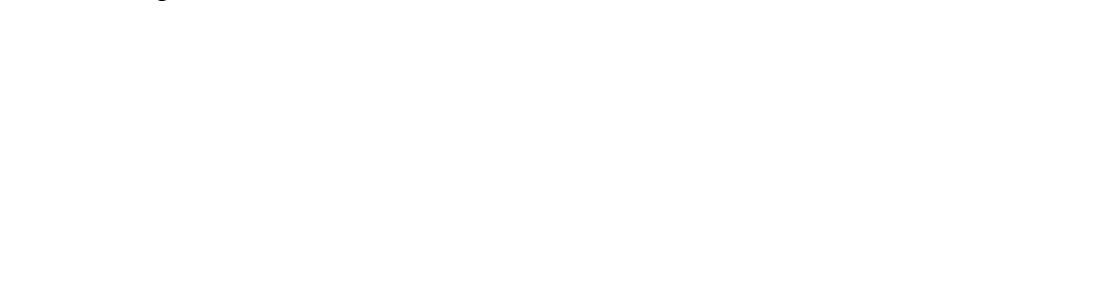



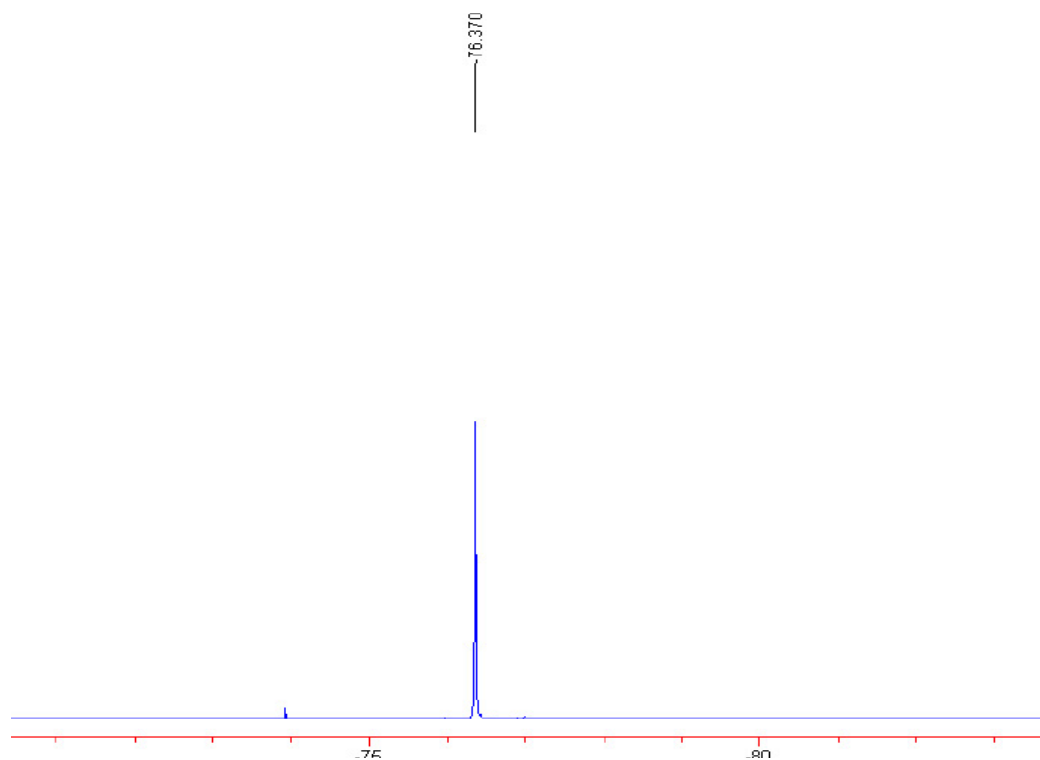

X-ray crystal structure of **2a**:

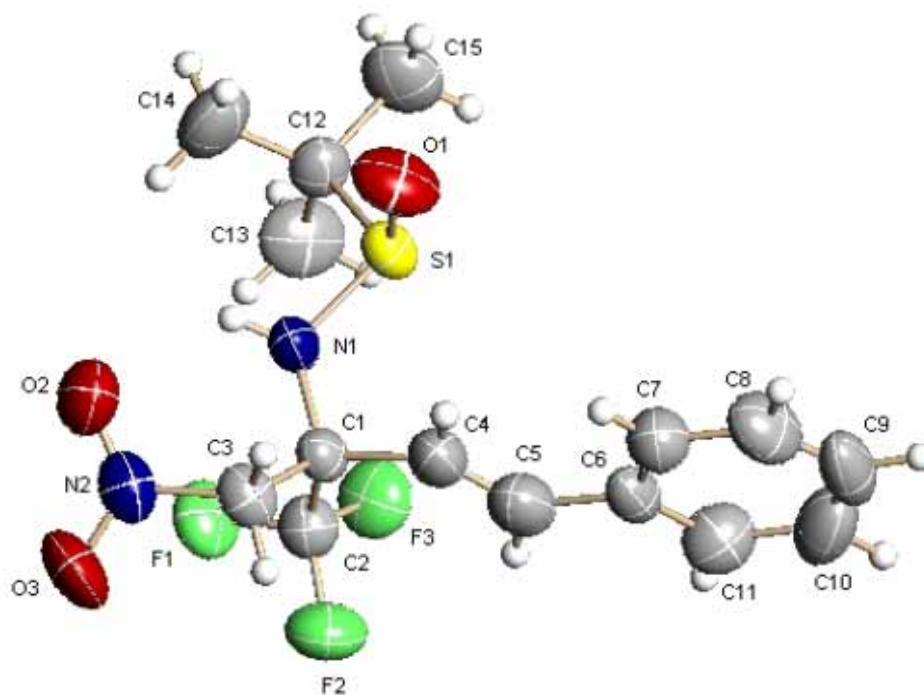

Crystal data and structure refinement for **2a**

---

|                     |                                                                                |
|---------------------|--------------------------------------------------------------------------------|
| Identification code | <b>2a</b>                                                                      |
| Empirical formula   | C <sub>15</sub> H <sub>19</sub> F <sub>3</sub> N <sub>2</sub> O <sub>3</sub> S |
| Formula weight      | 323.27                                                                         |

|                                   |                                                                                                                                      |
|-----------------------------------|--------------------------------------------------------------------------------------------------------------------------------------|
| Temperature                       | 293(2) K                                                                                                                             |
| Wavelength                        | 0.71073 Å                                                                                                                            |
| Crystal system, space group       | Triclinic, P-1                                                                                                                       |
| Unit cell dimensions              | a = 9.1431(10) Å    alpha = 98.890(2) deg.<br>b = 9.1984(11) Å    beta = 92.687(2) deg.<br>c = 21.398(3) Å    gamma = 95.661(2) deg. |
| Volume                            | 1765.8(4) Å <sup>3</sup>                                                                                                             |
| Z, Calculated density             | 4, 1.371 Mg/m <sup>3</sup>                                                                                                           |
| Absorption coefficient            | 0.228 mm <sup>-1</sup>                                                                                                               |
| F(000)                            | 760                                                                                                                                  |
| Crystal size                      | 0.421 x 0.396 x 0.223 mm                                                                                                             |
| Theta range for data collection   | 1.93 to 26.00 deg.                                                                                                                   |
| Limiting indices                  | -9<=h<=11, -11<=k<=11, -23<=l<=26                                                                                                    |
| Reflections collected / unique    | 9748 / 6628 [R(int) = 0.0668]                                                                                                        |
| Completeness to theta = 26.00     | 98.2 %                                                                                                                               |
| Absorption correction             | Empirical                                                                                                                            |
| Max. and min. transmission        | 1.0000 and 0.8044                                                                                                                    |
| Refinement method                 | Full-matrix least-squares on F <sup>2</sup>                                                                                          |
| Data / restraints / parameters    | 6828 / 2 / 447                                                                                                                       |
| Goodness-of-fit on F <sup>2</sup> | 0.888                                                                                                                                |
| Final R indices [I>2sigma(I)]     | R1 = 0.0562, wR2 = 0.1244                                                                                                            |
| R indices (all data)              | R1 = 0.0917, wR2 = 0.1391                                                                                                            |
| Largest diff. peak and hole       | 0.512 and -0.279 e.Å <sup>-3</sup>                                                                                                   |

---

**(E)-2-methyl-N-(1,1,1-trifluoro-4-(4-methoxyphenyl)-2-(nitromethyl)but-3-en-2-yl)propane-2-sulfinamide (2b)**

<sup>1</sup>HNMR

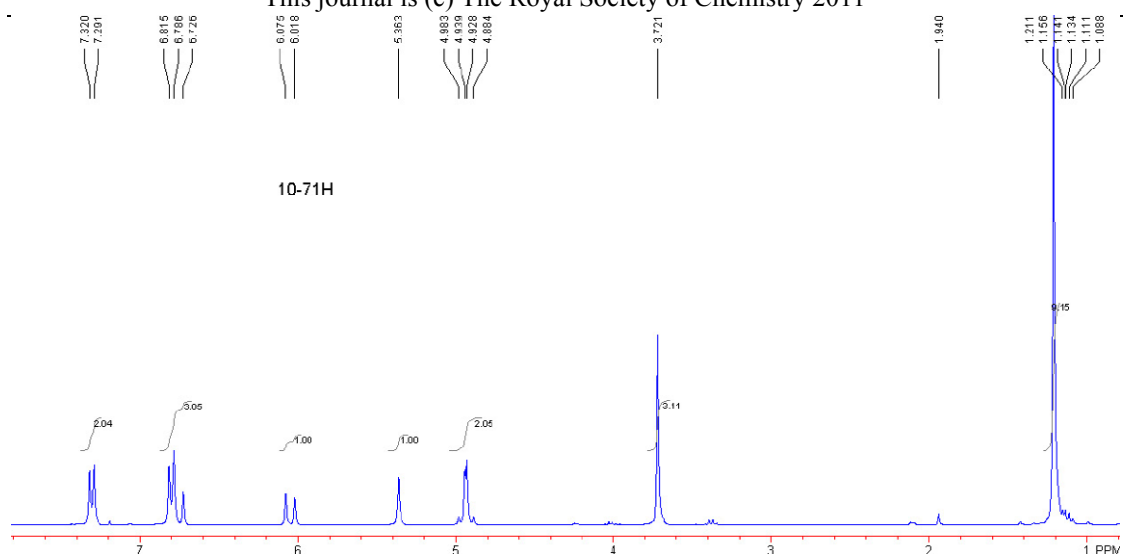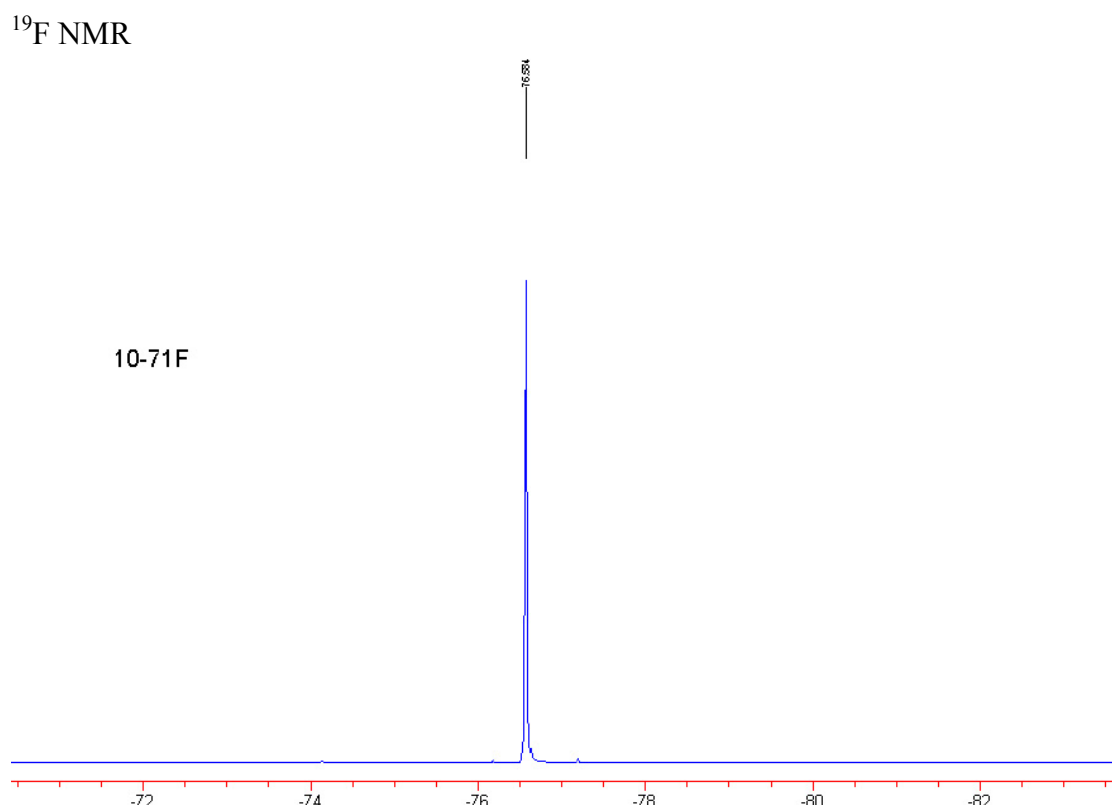

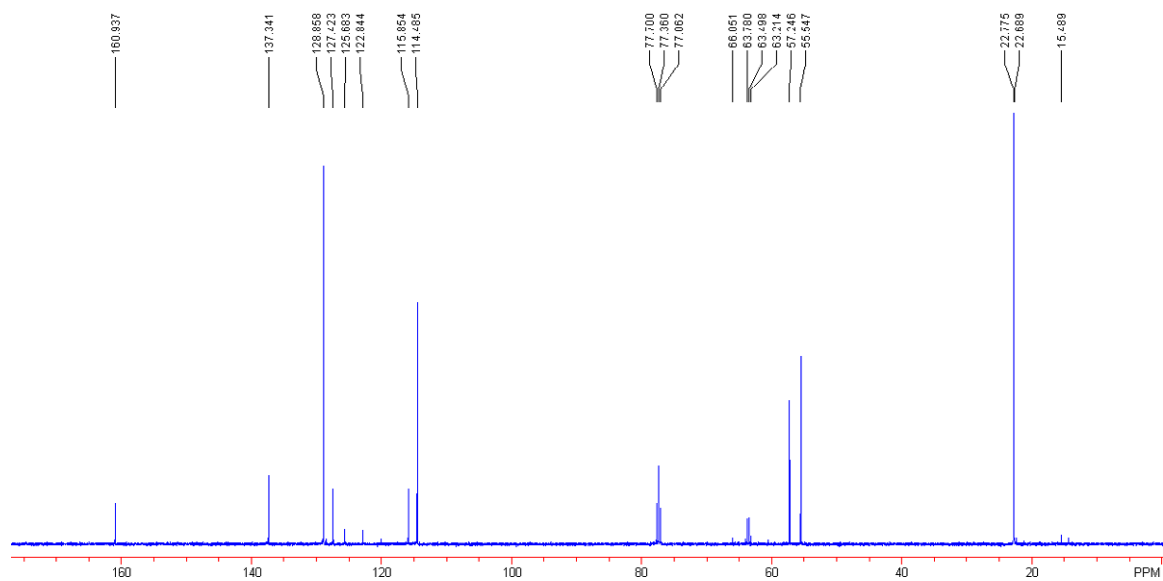

**(E)-N-(4-(4-chlorophenyl)-1,1,1-trifluoro-2-(nitromethyl)but-3-en-2-yl)-2-methylpropane-2-sulfinamide (2c)**

<sup>1</sup>H NMR

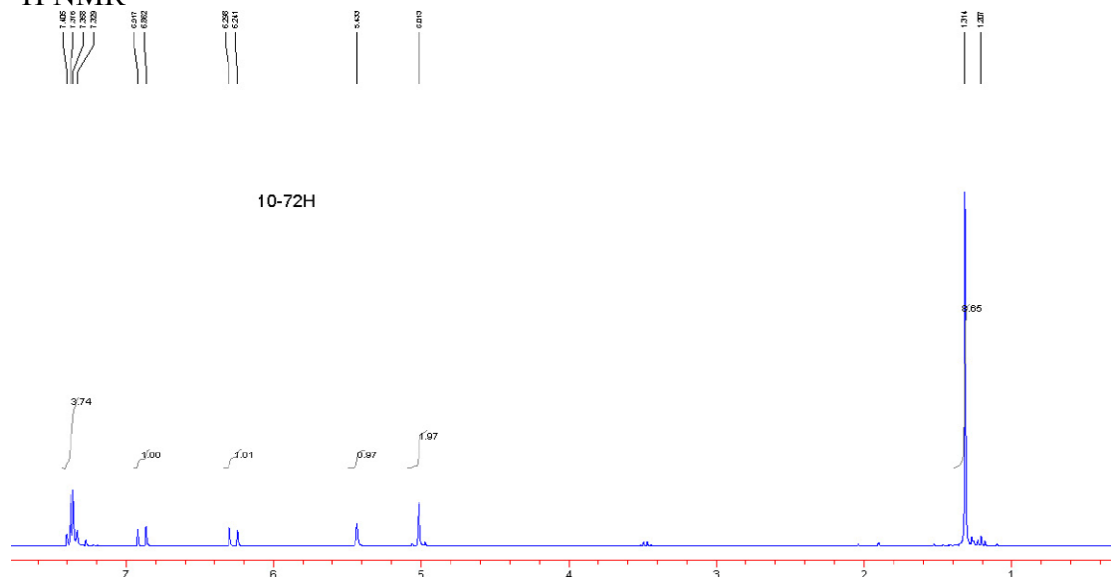

<sup>19</sup>F NMR

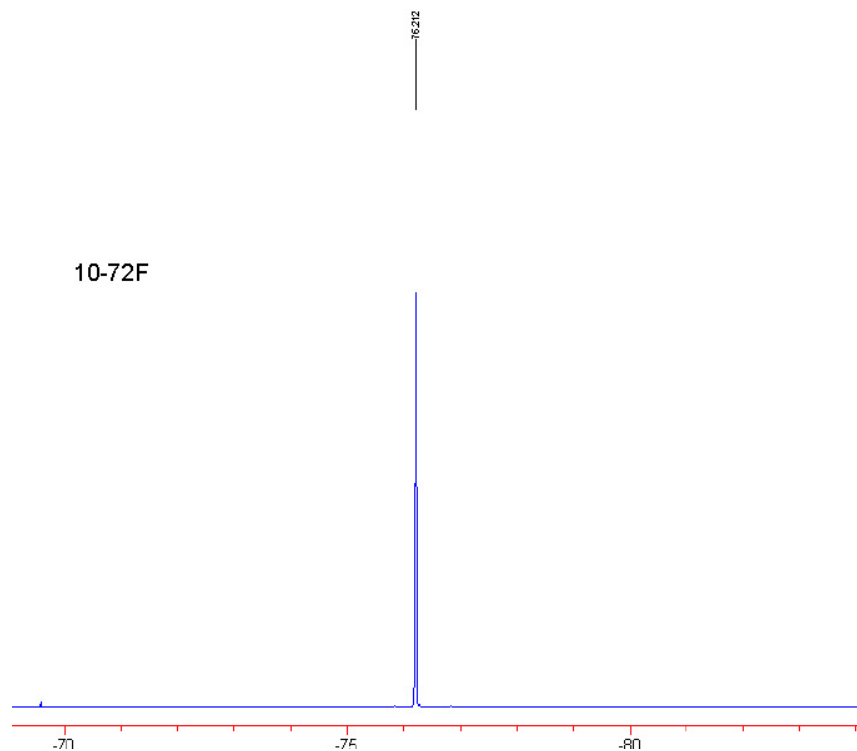

<sup>13</sup>C NMR

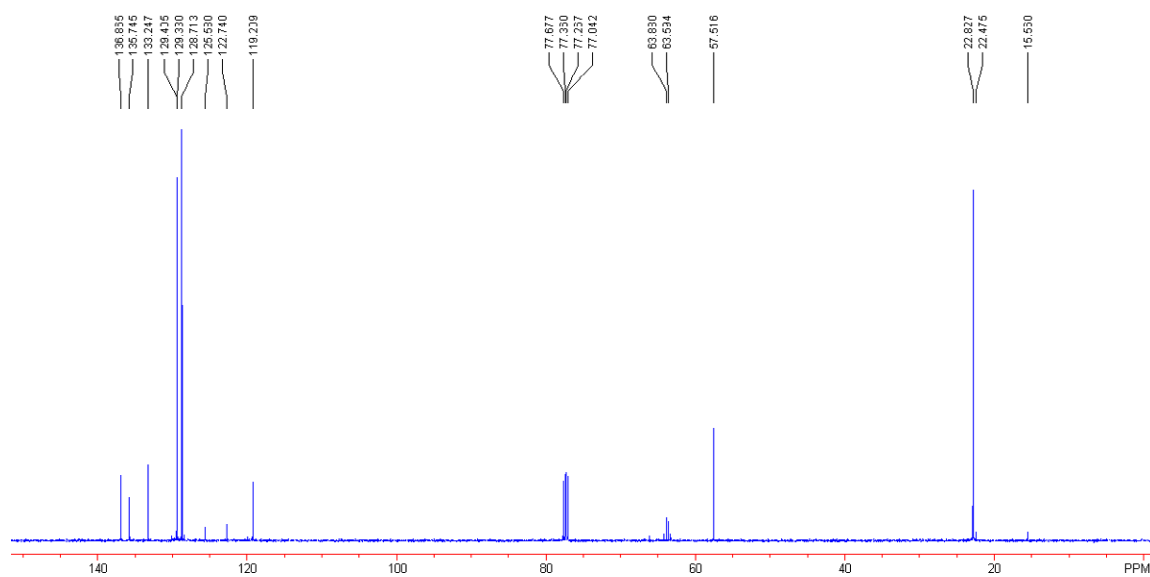

**(*E*)-2-methyl-*N*-(1,1,1-trifluoro-4-(naphthalen-1-yl)-2-(nitromethyl)but-3-en-2-yl)propane-2-sulfinamide (2d)**

<sup>1</sup>H NMR



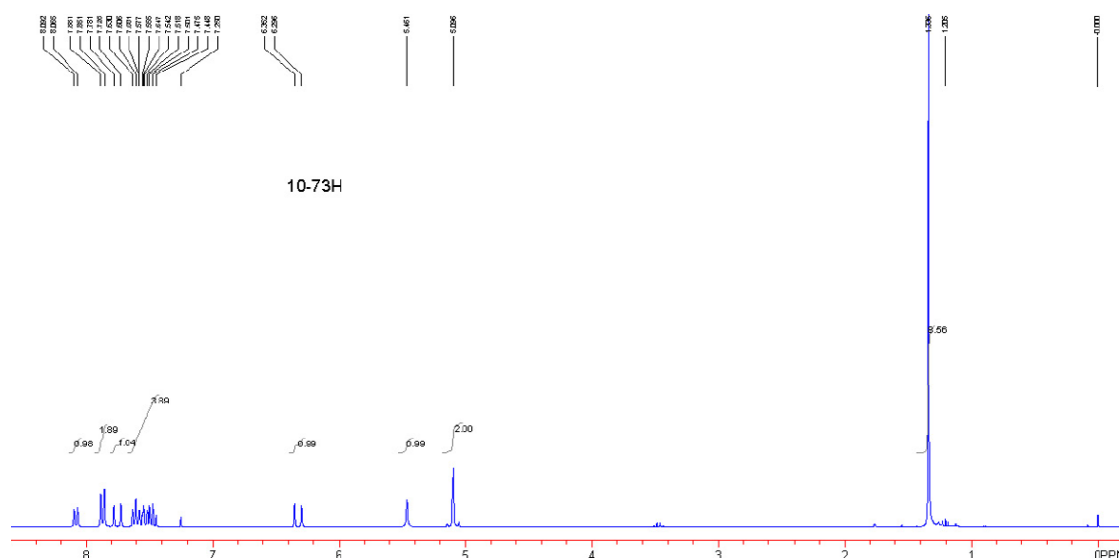

$^{19}\text{F}$  NMR

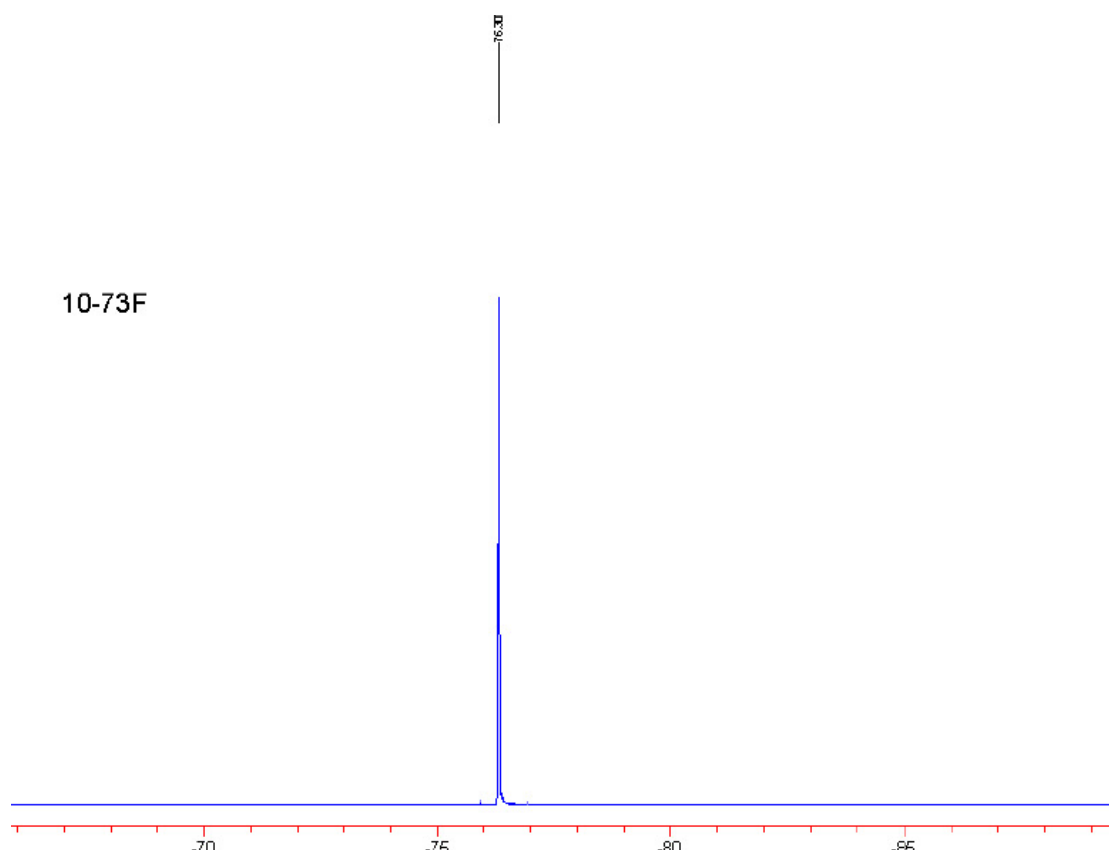

$^{13}\text{C}$  NMR

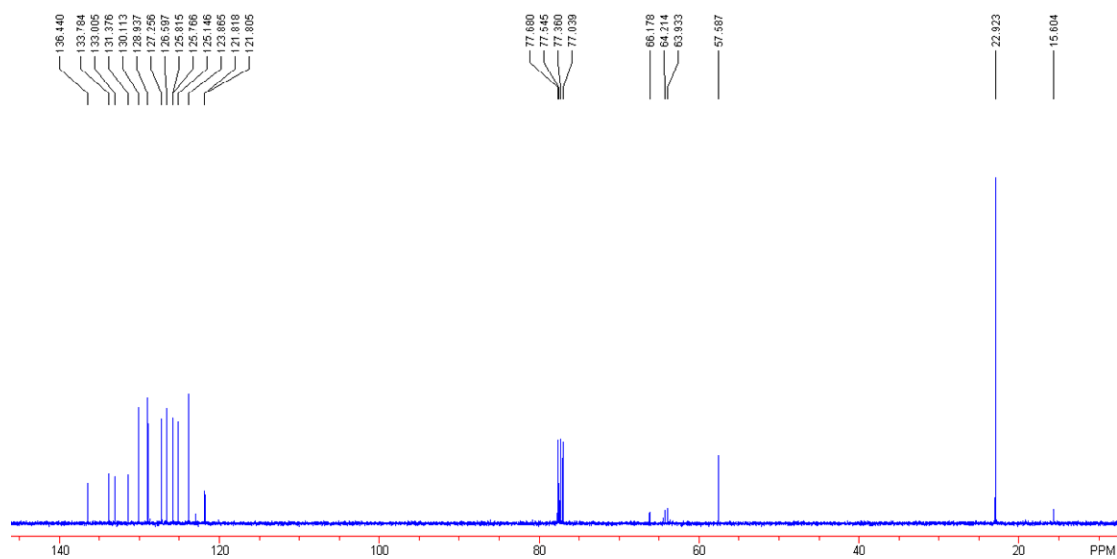

**(E)-2-methyl-N-(1,1,1-trifluoro-2-(nitromethyl)dodec-3-en-2-yl)propane-2-sulfonamide (2e)**

<sup>1</sup>H NMR

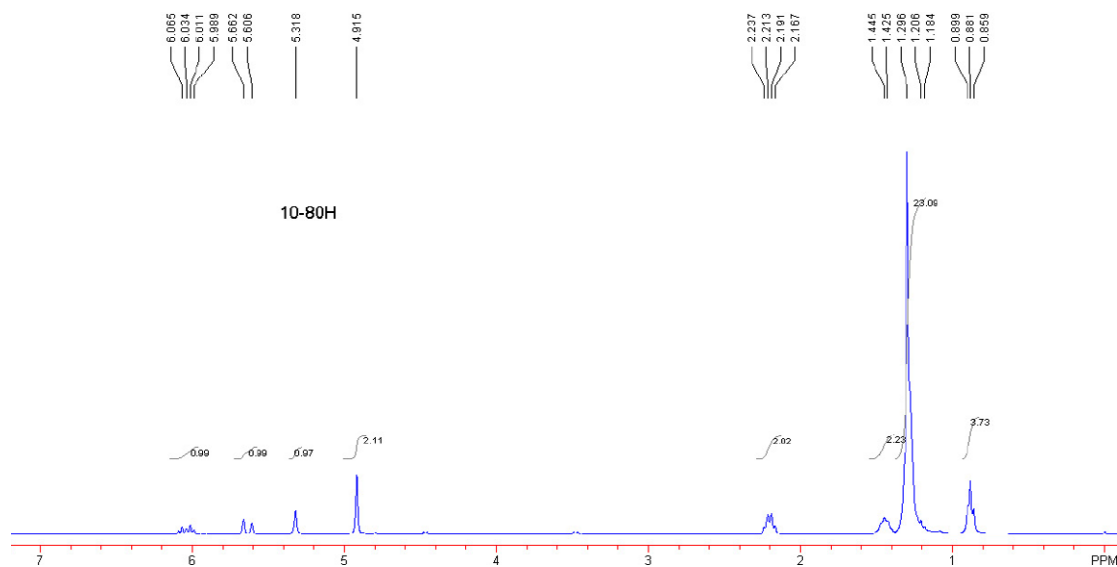

<sup>19</sup>F NMR

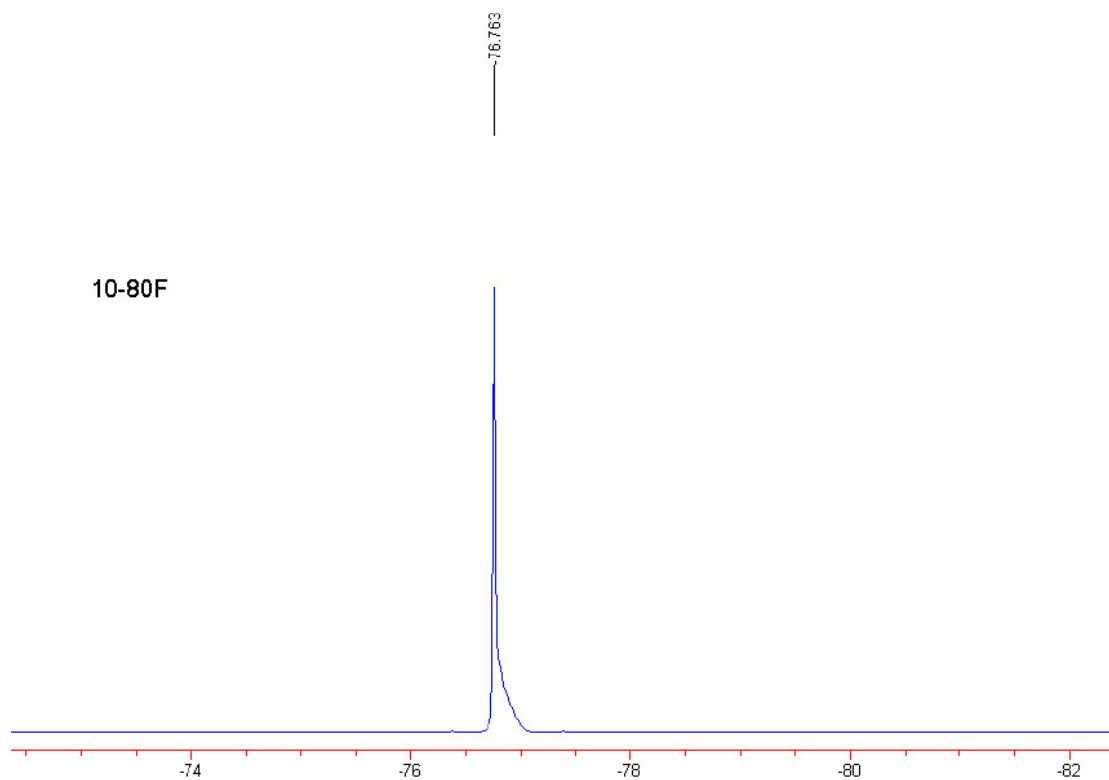

<sup>13</sup>C NMR

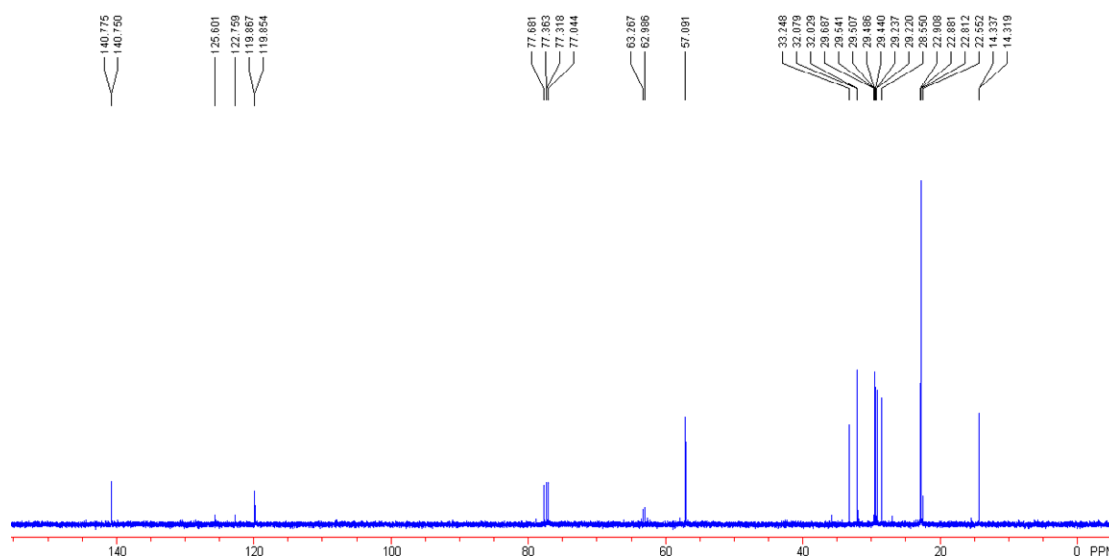

**(*E*)-*N*-(1-chloro-1,1-difluoro-2-(nitromethyl)-4-phenylbut-3-en-2-yl)-2-methylpropane-2-sulfinamide (2f)**

<sup>1</sup>H NMR

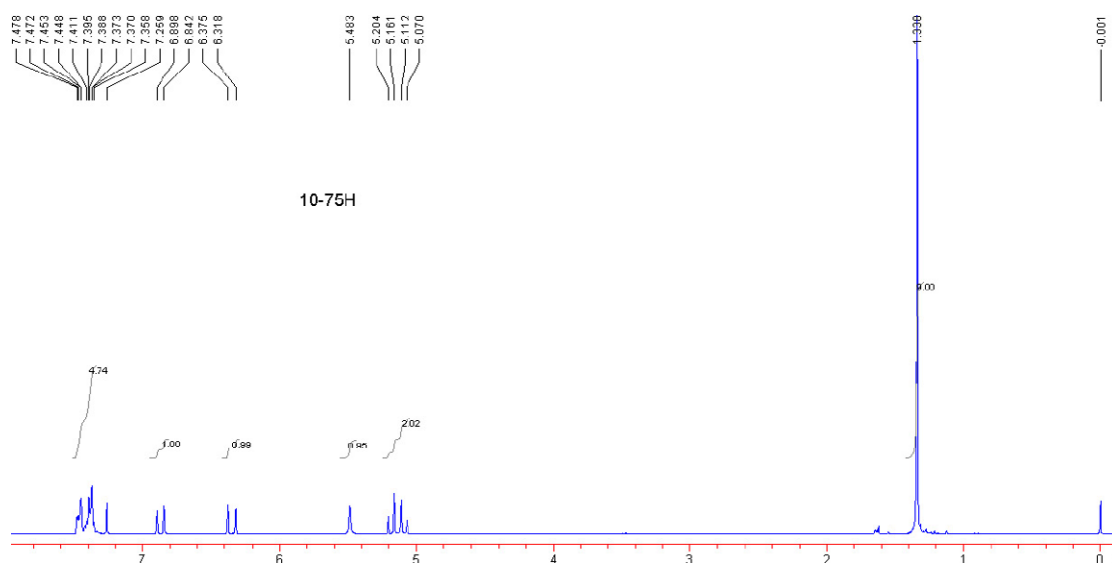

<sup>19</sup>F NMR

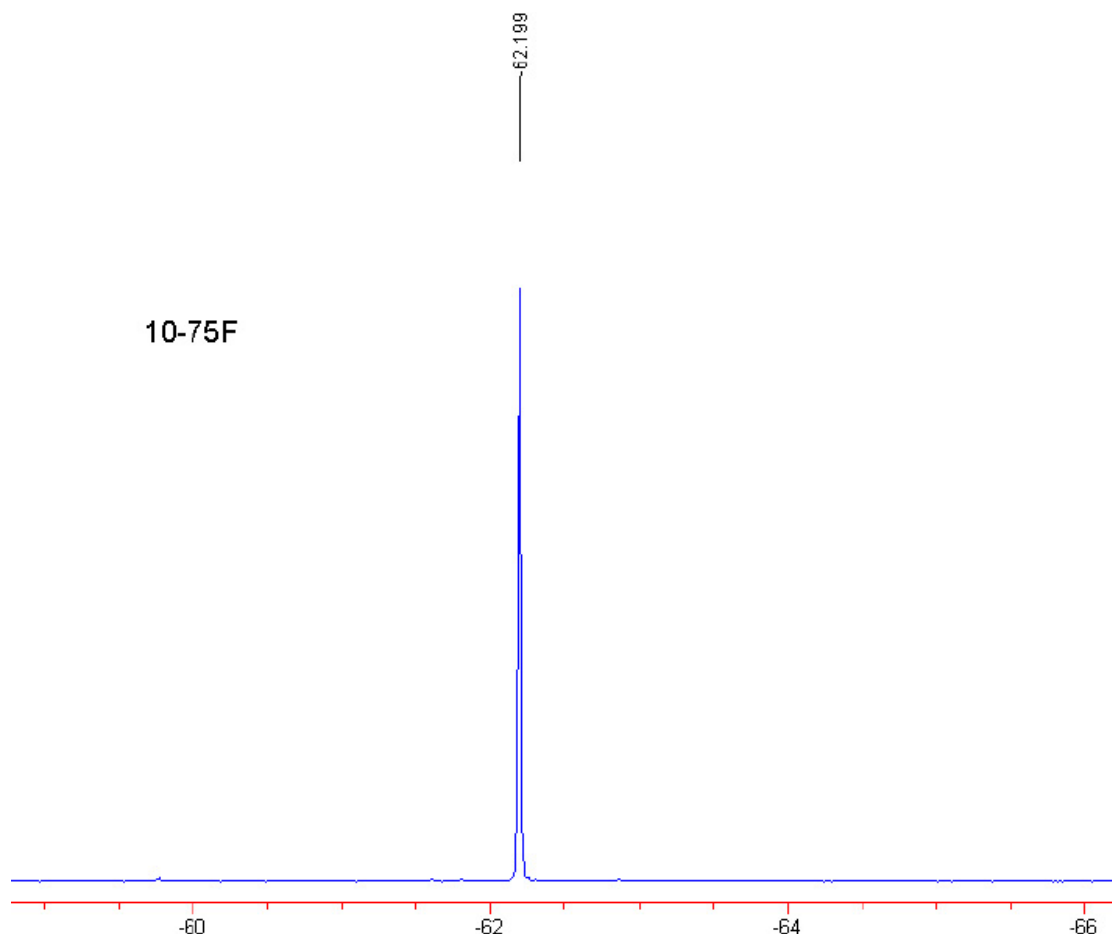

**(E)-N-(1,1-difluoro-2-(nitromethyl)-4-phenylbut-3-en-2-yl)-2-methylpropane-2-sulfinamide (2g)**

<sup>1</sup>H NMR

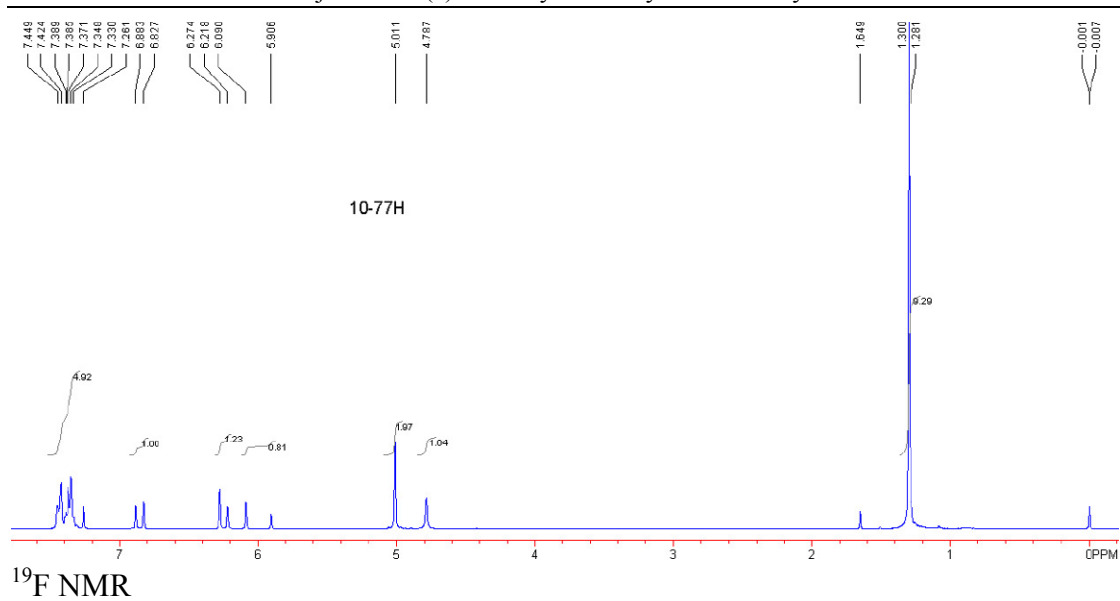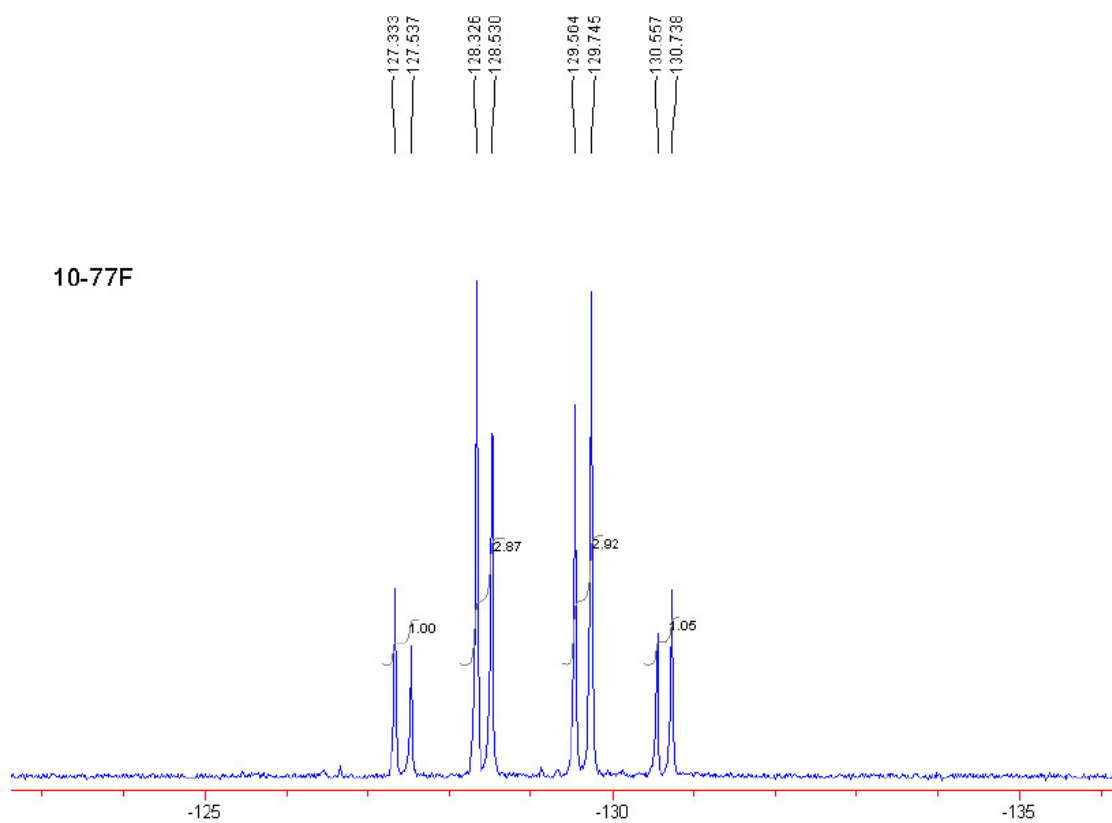

**(R)-N-(1,1,1,2,2,3,3-heptafluoro-7-nitro-6-phenylheptan-4-ylidene)-2-methylpropane-2-sulfonamide (2h-1)**

$^1\text{H}$  NMR

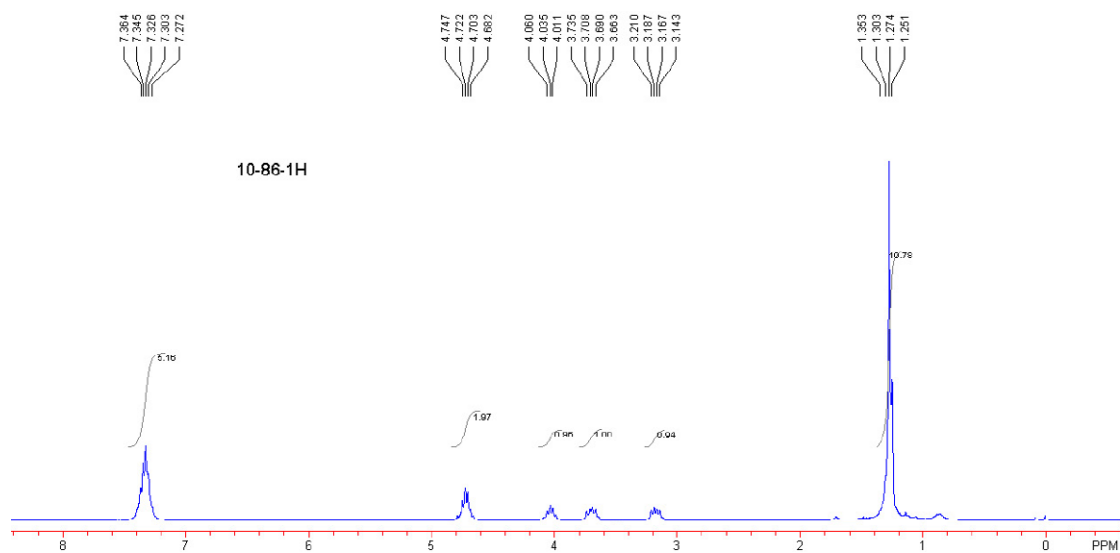

<sup>19</sup>F NMR

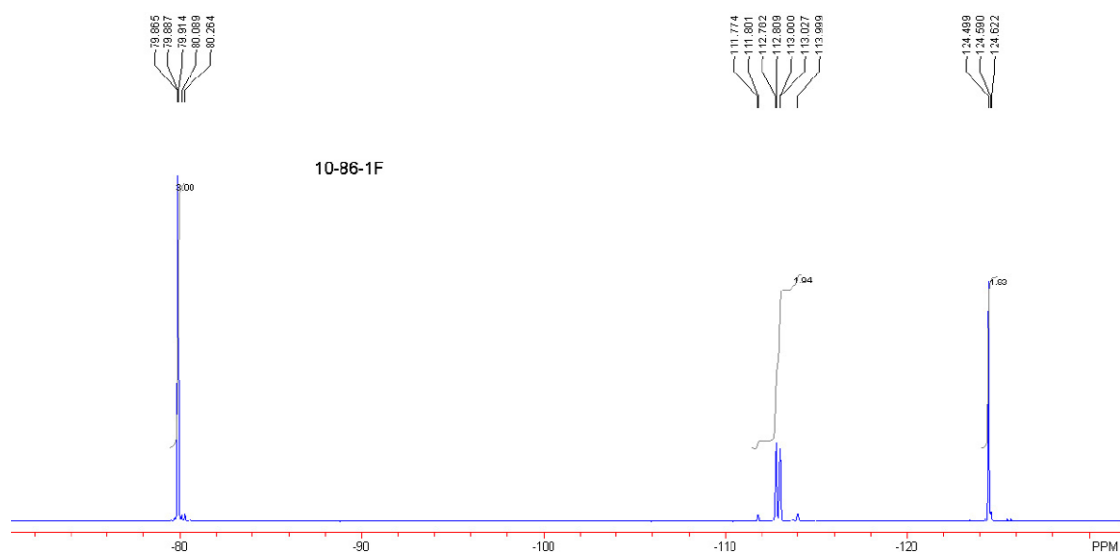

<sup>13</sup>C NMR

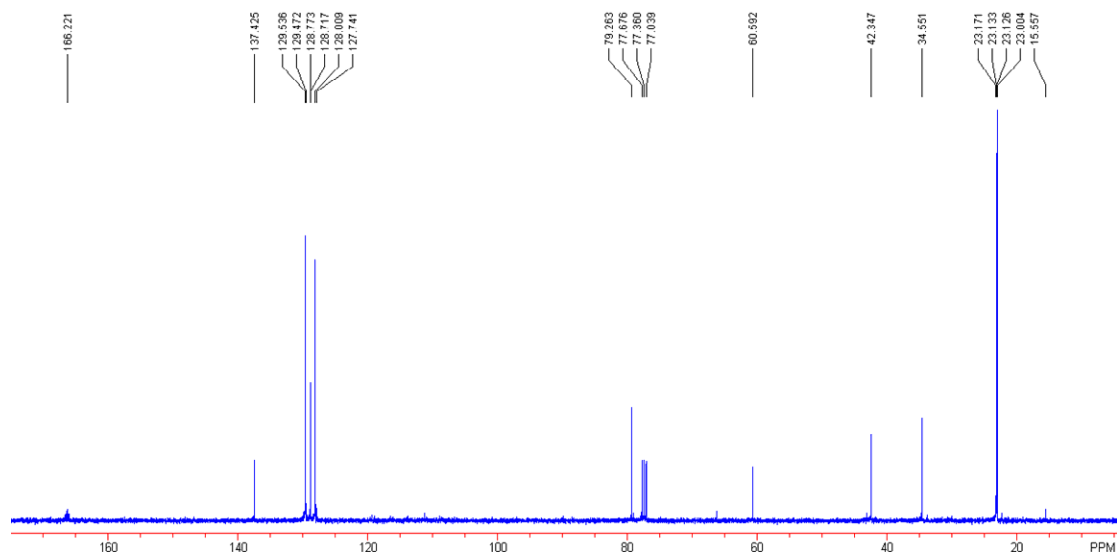

**(R)-2-methyl-N-((Z)-1,1,1-trifluoro-5-nitro-4-phenylpent-2-en-2-yl)propane-2-sulfonamide (2h-2)**

<sup>1</sup>H NMR

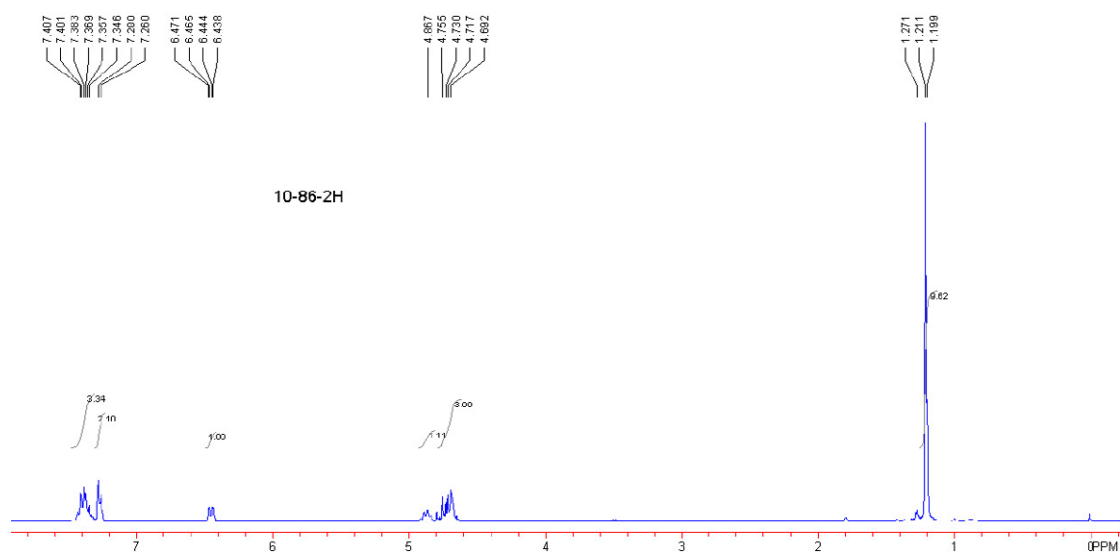

<sup>1</sup>H NMR (after D<sub>2</sub>O exchanging)

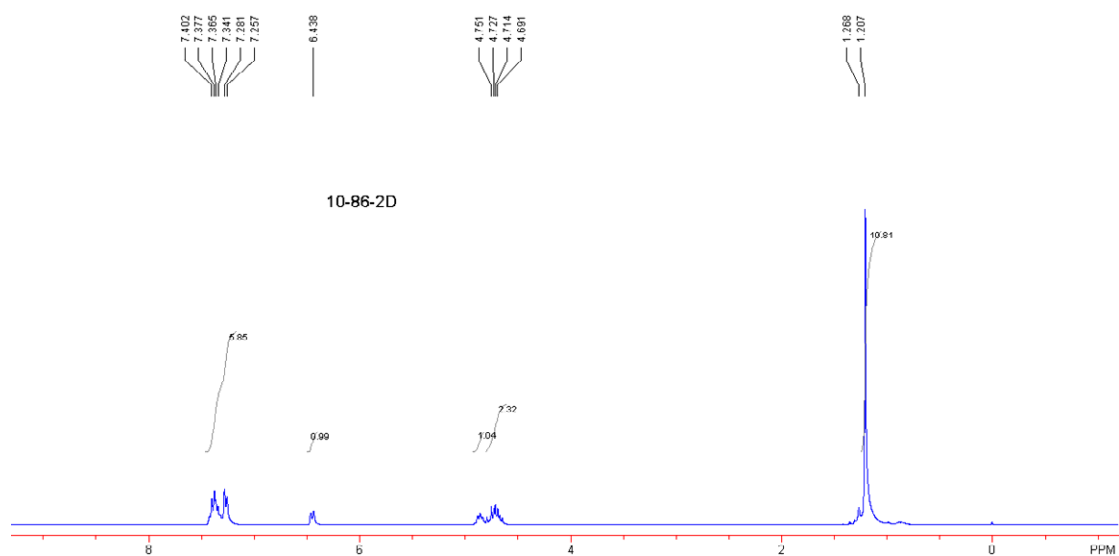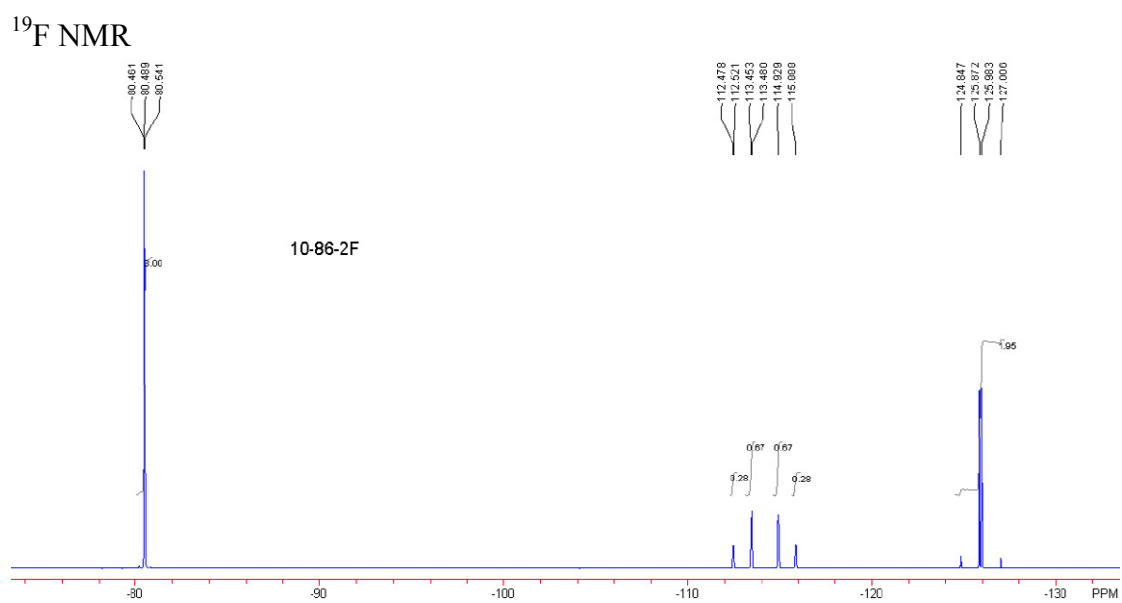

<sup>13</sup>C NMR



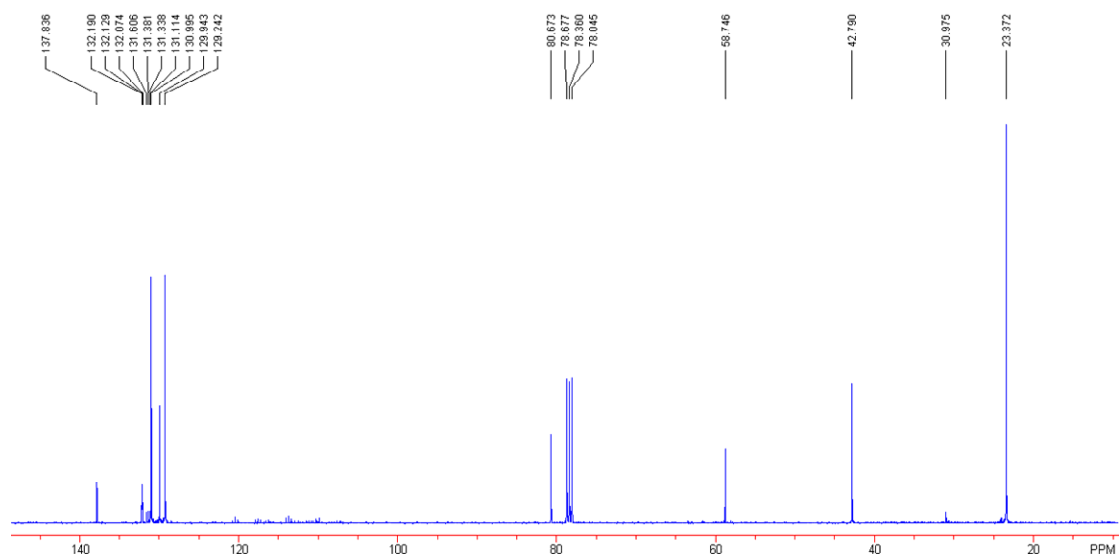

HMQC

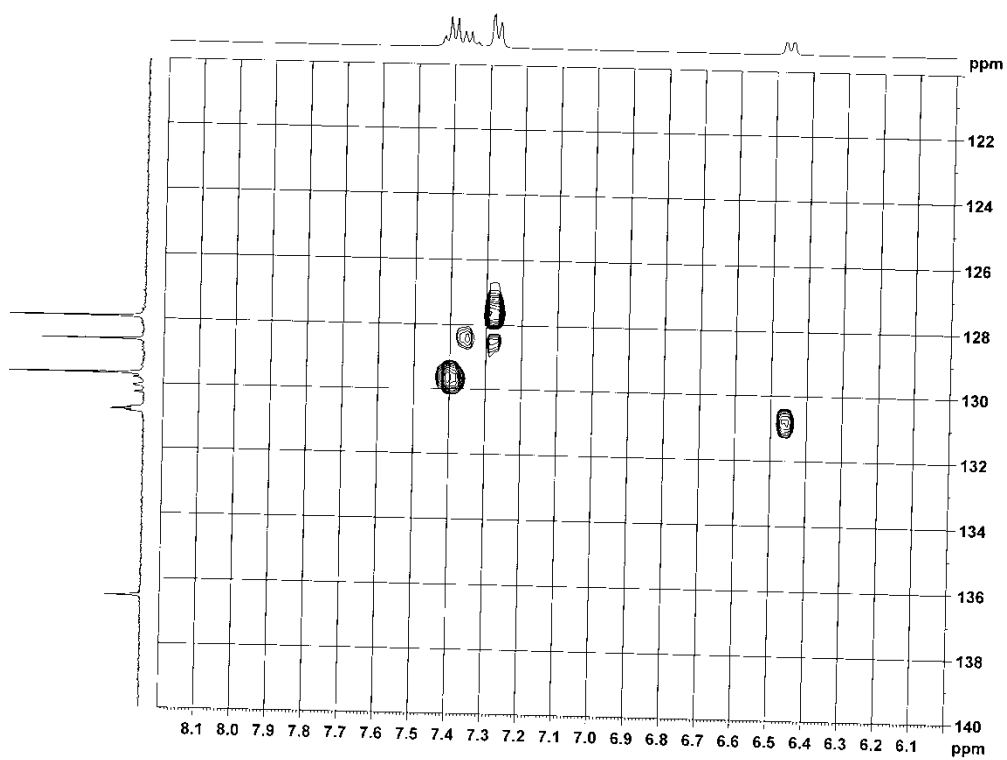

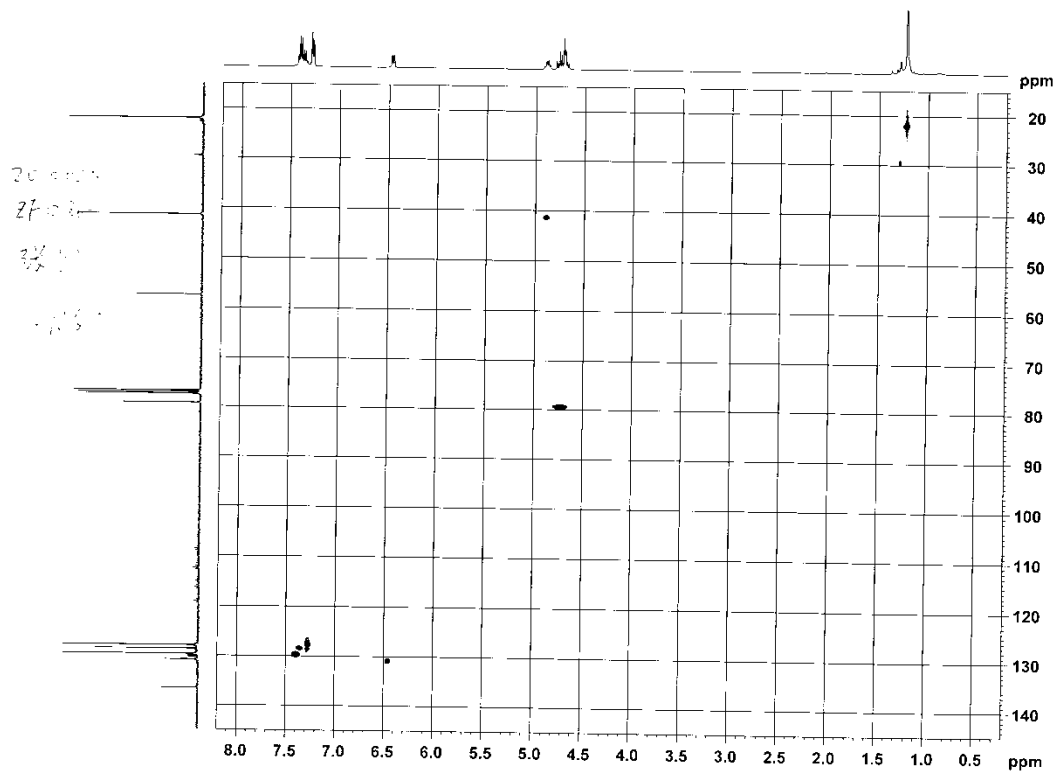

**(*S,E*)-4-phenyl-2-(trifluoromethyl)but-3-ene-1,2-diamine 4a**

<sup>1</sup>H NMR

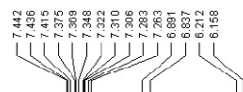

11-40-1H

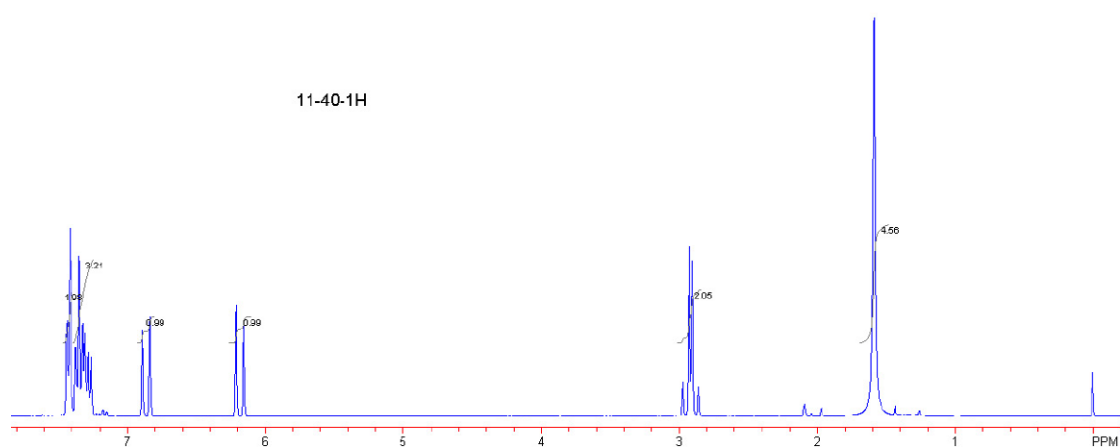

<sup>19</sup>F NMR

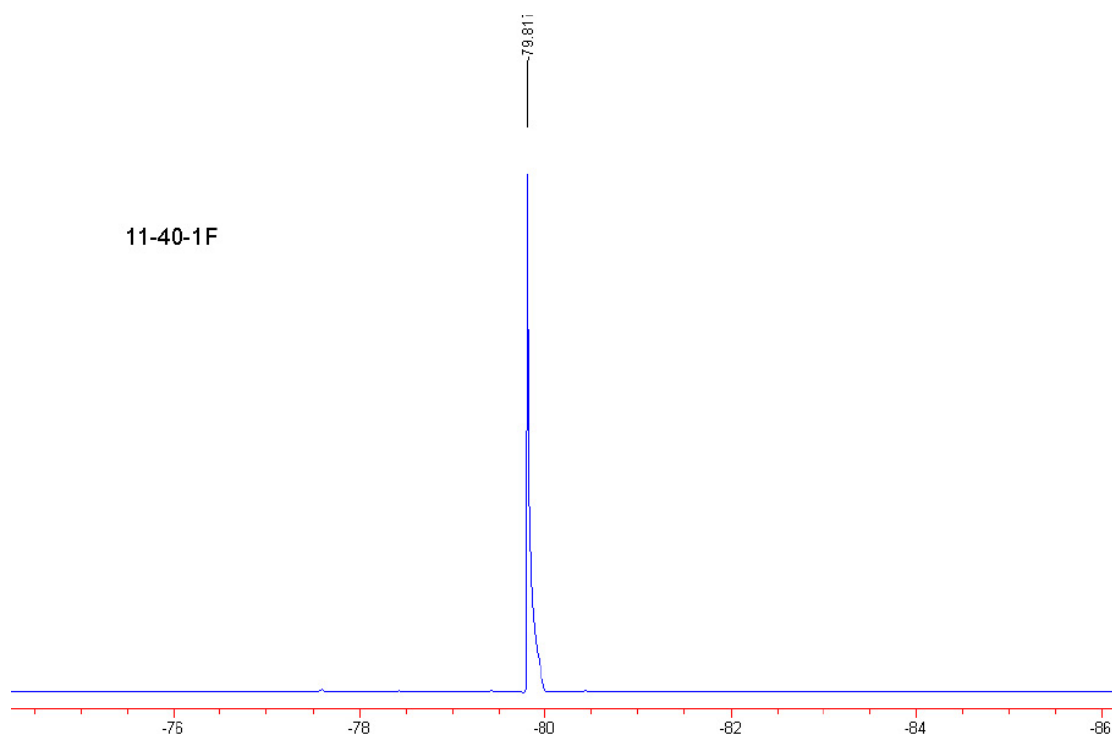

$^{13}\text{C}$  NMR

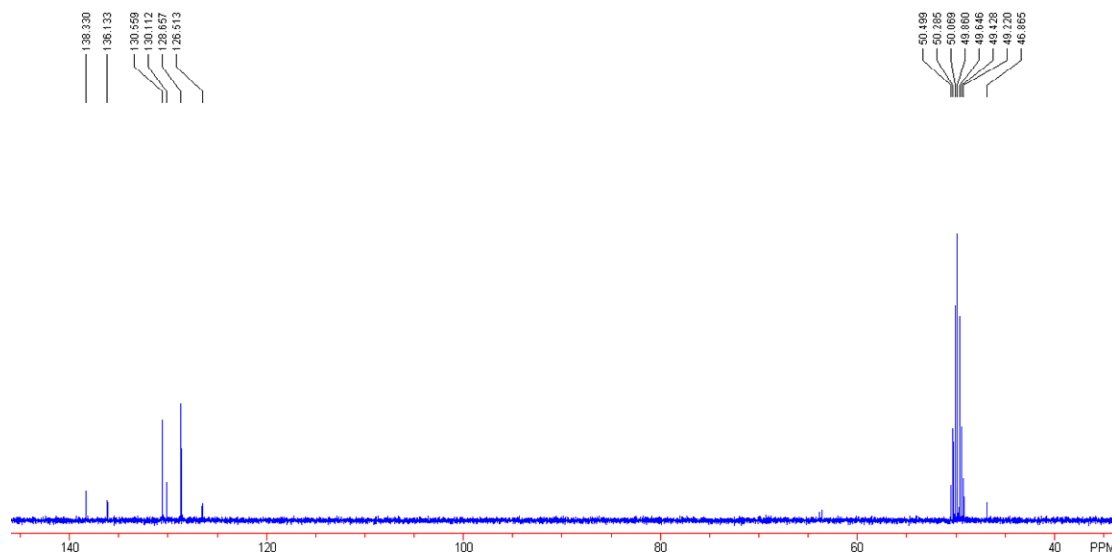

**(*S, E*)-di-*tert*-butyl 4-phenyl-2-(trifluoromethyl)but-3-ene-1,2-diyl dicarbamate  
(5a)**

$^1\text{H}$  NMR

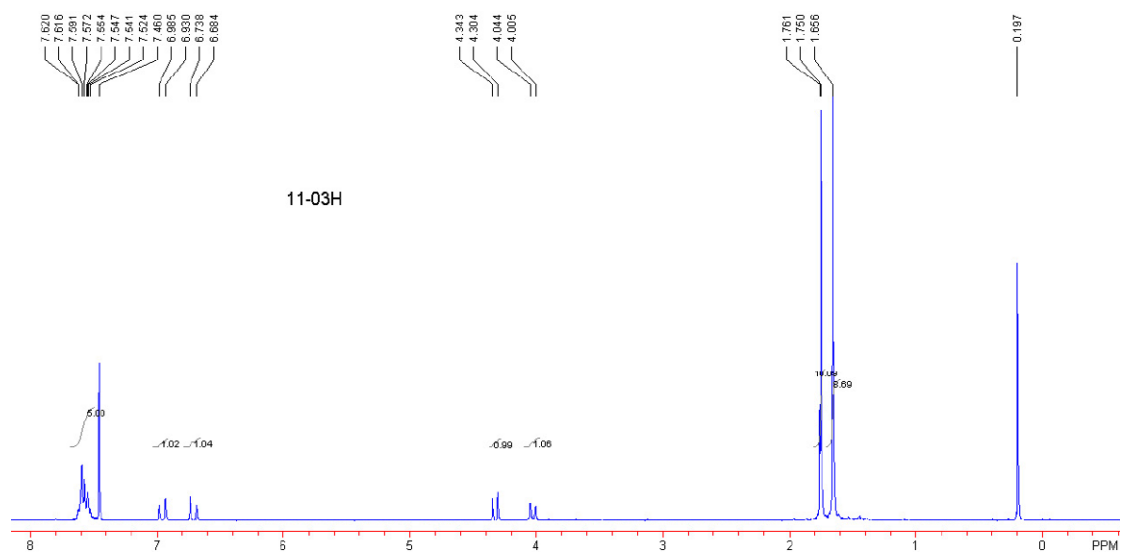

<sup>19</sup>F NMR

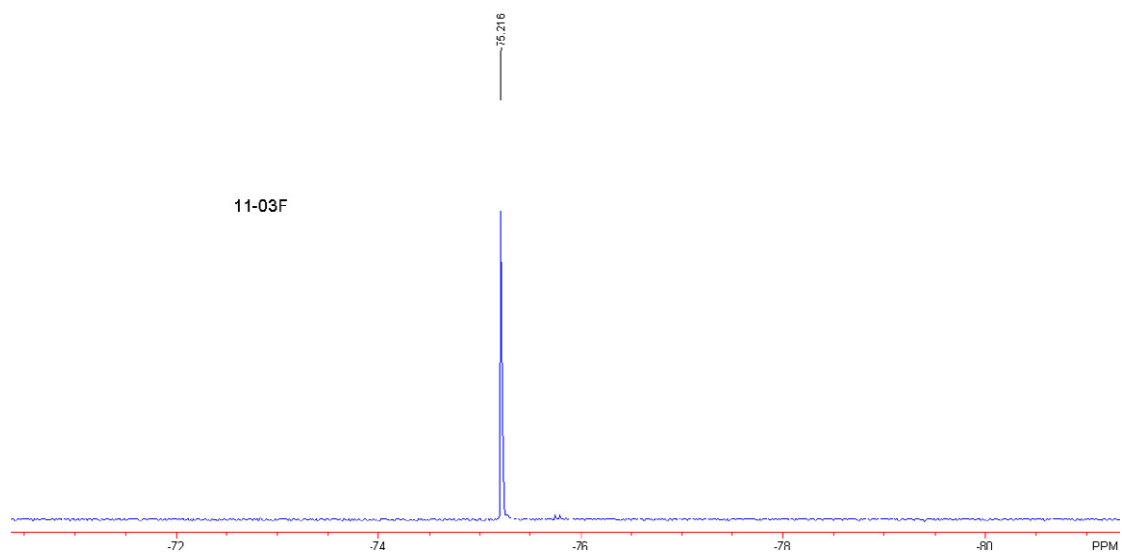

**(R)-di-tert-butyl 3,3,3-trifluoro-2-formylpropane-1,2-diylldicarbamate (6a)**

<sup>1</sup>H NMR

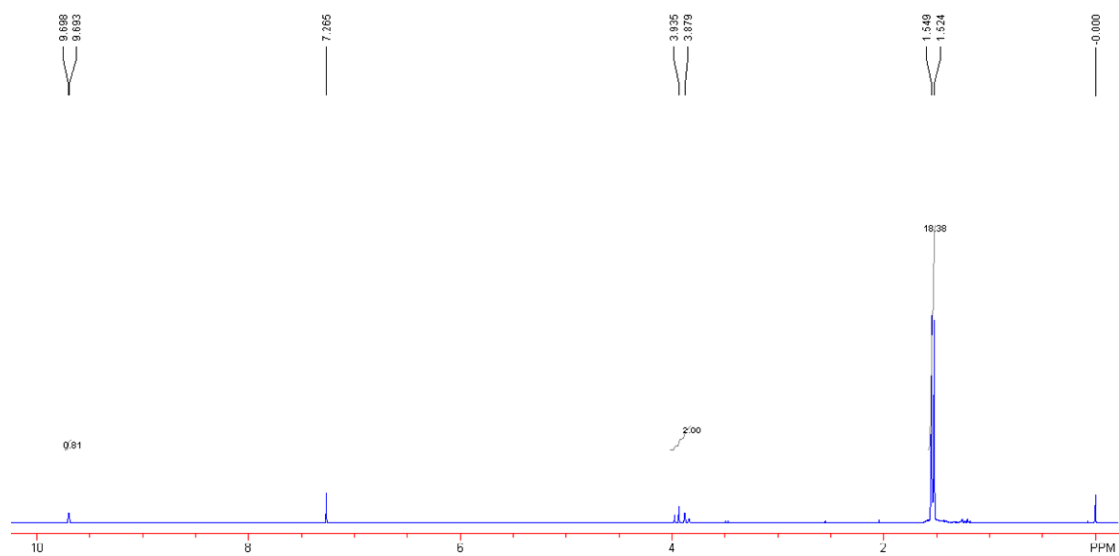

$^{19}\text{F}$  NMR

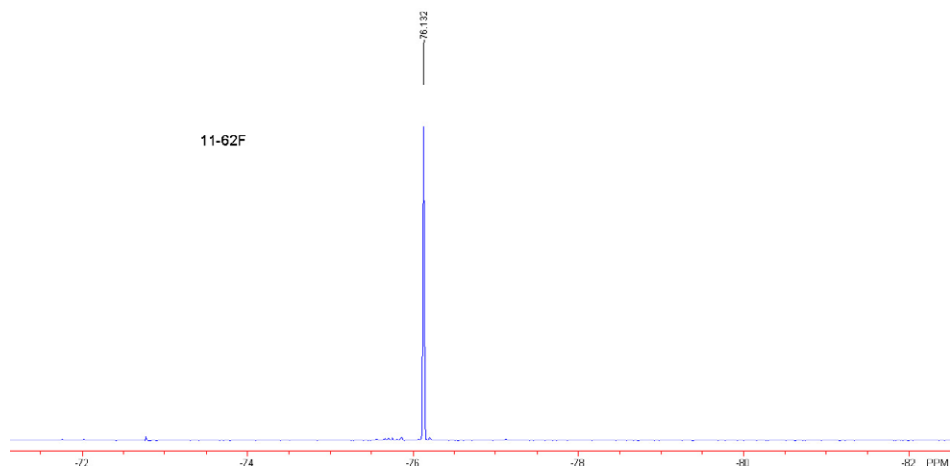

**(*R*)-2-(tert-butoxycarbonylamino)-2-((tert-butoxycarbonylamino)methyl)-3,3,3-trifluoropropanoic acid (7a)**

$^1\text{H}$  NMR

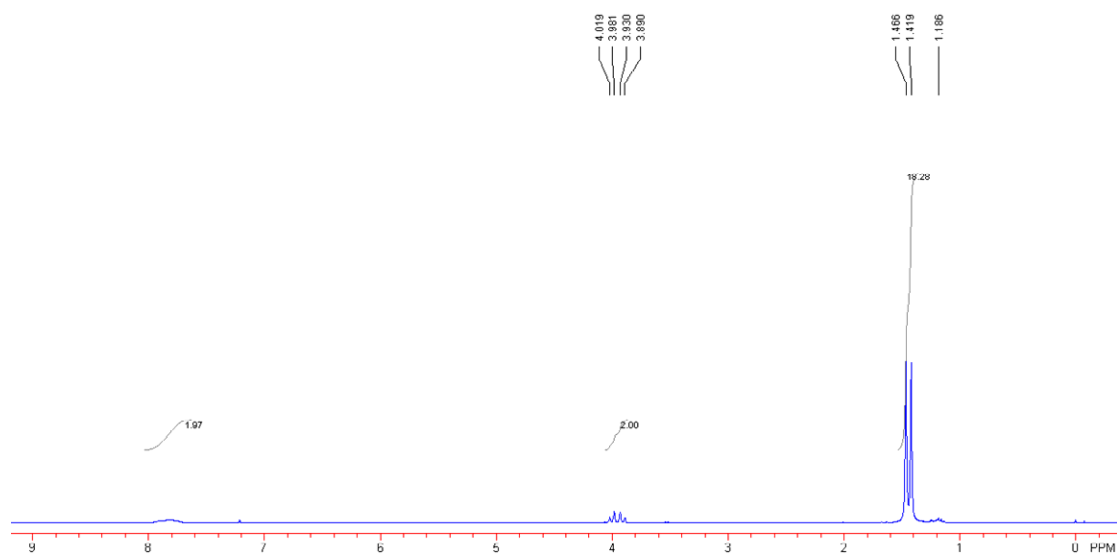

<sup>19</sup>F NMR

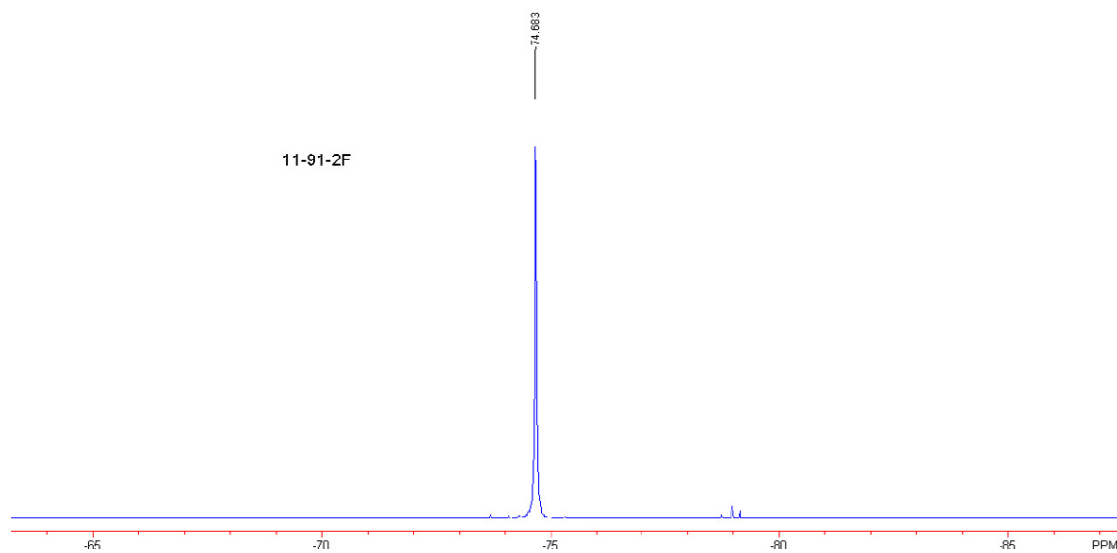

**(R)-methyl 2-amino-2-(aminomethyl)-3,3,3-trifluoropropanoate (8a)**

<sup>1</sup>H NMR

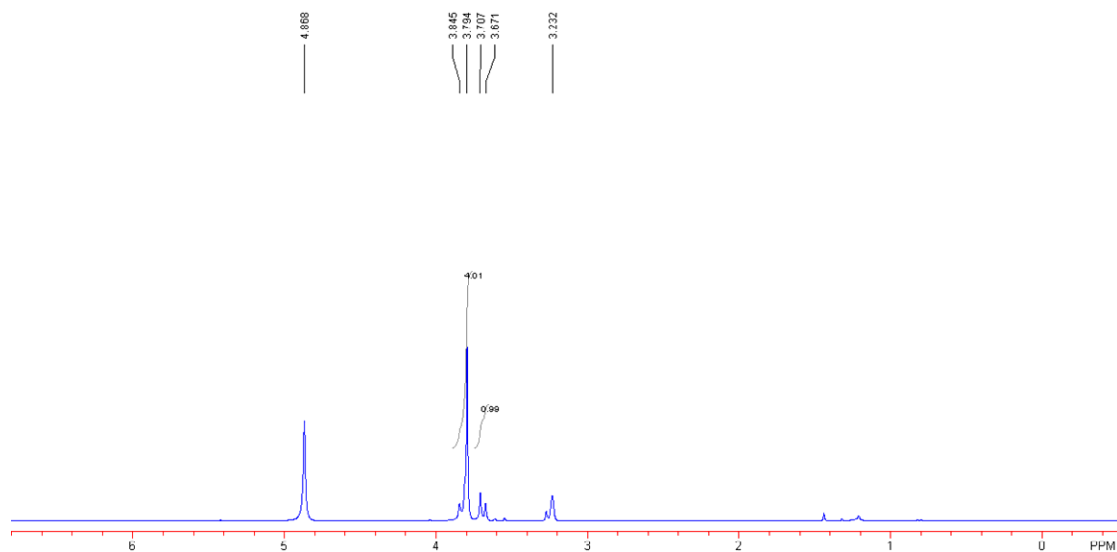

$^{19}\text{F}$  NMR

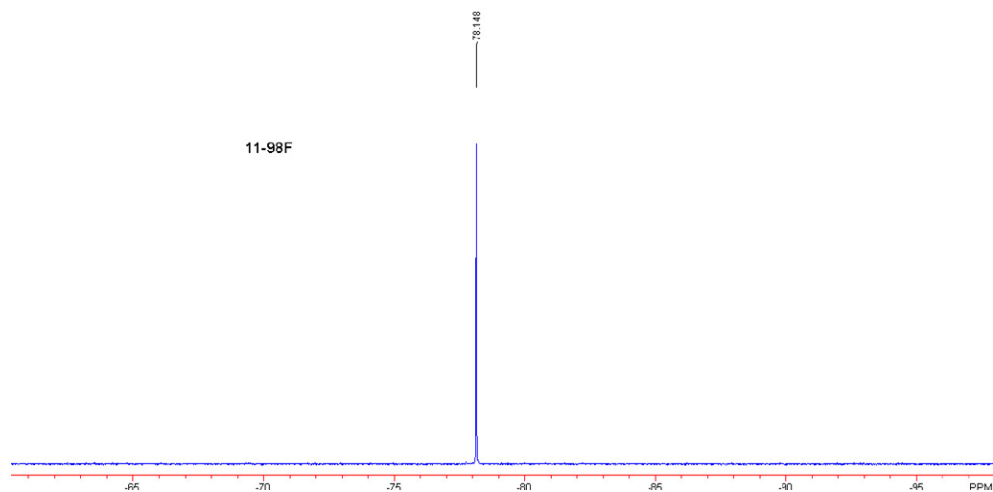

$^{13}\text{C}$  NMR

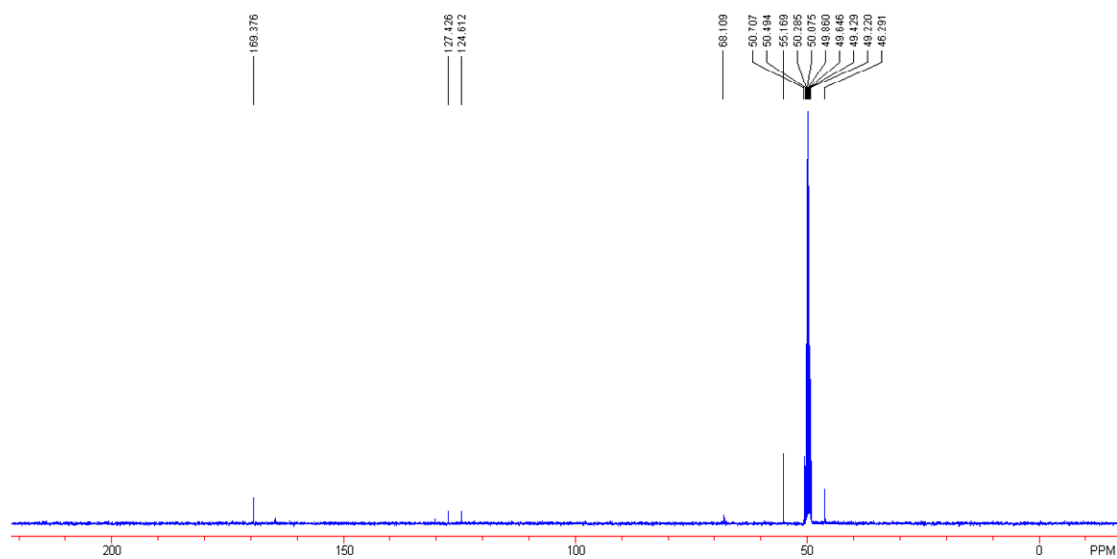

Supplement: c1ob05132f.pdf [file c1ob05132f.pdf]
